# Supplementary material
Source: ML conference proceedings conference paper supplement (https://proceedings.neurips.cc/paper_files/paper/2022/hash/4937610670be26d651ecdb4f2206d95f-Abstract.html)
Supplement: Supplementary file 1 [file 4937610670be26d651ecdb4f2206d95f-Supplemental-Conference.zip]

Archive with 58 entries (53 files):
- Fairness_Transferability/
- Fairness_Transferability/dp_states/
- Fairness_Transferability/dp_states/FairTransferByYear.py
- Fairness_Transferability/dp_states/FairTransferByState.py
- Fairness_Transferability/dp_states/main.py
- Fairness_Transferability/cov_states/
- Fairness_Transferability/cov_states/NV_IL_shifted_viol
- Fairness_Transferability/cov_states/CA_IL_EO_bound.pdf
- Fairness_Transferability/cov_states/IL_cdf.csv
- Fairness_Transferability/cov_states/CA_NV_phi_g
- Fairness_Transferability/cov_states/NV_IL_phi_h
- Fairness_Transferability/cov_states/CA_NV_phi_h
- Fairness_Transferability/cov_states/NV_IL_phi_g
- Fairness_Transferability/cov_states/CA_default.csv
- Fairness_Transferability/cov_states/NV_IL_EO_bound.pdf
- Fairness_Transferability/cov_states/CA_IL_shifted_viol
- Fairness_Transferability/cov_states/NV_default.csv
- Fairness_Transferability/cov_states/CA_NV_upper_bound
- Fairness_Transferability/cov_states/CA_IL_upper_bound
- Fairness_Transferability/cov_states/CA_NV_shifted_viol
- Fairness_Transferability/cov_states/IL_default.csv
- Fairness_Transferability/cov_states/NV_IL_upper_bound
- Fairness_Transferability/cov_states/totals.csv
- Fairness_Transferability/cov_states/CA_IL_phi_h
- Fairness_Transferability/cov_states/CA_NV_EO_bound.pdf
- Fairness_Transferability/cov_states/CA_IL_phi_g
- Fairness_Transferability/cov_states/main.py
- Fairness_Transferability/cov_states/CA_cdf.csv
- Fairness_Transferability/cov_states/NV_cdf.csv
- Fairness_Transferability/replicator/
- Fairness_Transferability/replicator/system.py
- Fairness_Transferability/replicator/responses.py
- Fairness_Transferability/replicator/util.py
- Fairness_Transferability/replicator/transfer.pdf
- Fairness_Transferability/replicator/setting.py
- Fairness_Transferability/replicator/readme.md
- Fairness_Transferability/replicator/classifiers.py
- Fairness_Transferability/replicator/.gitignore
- Fairness_Transferability/replicator/s.p
- Fairness_Transferability/replicator/main.py
- Fairness_Transferability/replicator/state.py
- Fairness_Transferability/covariate/
- Fairness_Transferability/covariate/default_by_race.csv
- Fairness_Transferability/covariate/dp_upper_bound
- Fairness_Transferability/covariate/cdf_by_race.csv
- Fairness_Transferability/covariate/DP_bound.pdf
- Fairness_Transferability/covariate/max_bgs
- Fairness_Transferability/covariate/dp_strategic_manipulation
- Fairness_Transferability/covariate/EO_bound.pdf
- Fairness_Transferability/covariate/source_tpr
- Fairness_Transferability/covariate/dp_source_ac
- Fairness_Transferability/covariate/strategic_manipulation
- Fairness_Transferability/covariate/upper_bound
- Fairness_Transferability/covariate/totals.csv
- Fairness_Transferability/covariate/dp_max_bgs
- Fairness_Transferability/covariate/main.py
- Fairness_Transferability/Appendices.pdf
- Fairness_Transferability/readme.md
