# Supplementary material
Source: ML conference proceedings conference paper supplement (https://proceedings.neurips.cc/paper_files/paper/2022/hash/4937610670be26d651ecdb4f2206d95f-Abstract.html)
Supplement: Supplementary file 1 [file 4937610670be26d651ecdb4f2206d95f-Supplemental-Conference.zip › Fairness_Transferability/cov_states/CA_cdf.csv]

	Score	Group_0	Group_1	Group_2	Group_3
0	0.0	0.0	0.0	0.0	0.0
1	0.5	0.0	0.00643930552089957	0.013422098142381619	0.0
2	1.0	0.009652975529707033	0.027367048463823172	0.021475357027810588	0.0
3	1.5	0.07239731647280274	0.09095519048270644	0.042950714055621175	0.0
4	2.0	0.20753897388870118	0.1875447732962	0.08321700848276602	0.05770340450086555
5	2.5	0.39094550895313485	0.34128319260767725	0.1718028562224847	0.2308136180034622
6	3.0	0.579178531782422	0.6052947189645597	0.3221303554171588	0.51933064050779
7	3.5	0.7963704812008303	0.8636718529906549	0.45635133684097495	0.7501442585112521
8	4.0	1.1631835513296975	1.1606848201421476	0.6952646837753677	0.8655510675129832
9	4.5	1.6313528645204882	1.5567021096774714	0.8751207988832814	1.154068090017311
10	5.0	2.0609102755924513	1.9696225762051565	1.1408783421024373	1.8465089440276978
11	5.5	2.533906076548096	2.425203441808801	1.444217760120262	2.308136180034622
12	6.0	2.982769438679473	2.8968825712146944	1.7207129818533233	2.59665320253895
13	6.5	3.5378155316376274	3.4844691999967807	1.9623107484161924	2.827466820542412
14	7.0	4.170085428833438	4.045493693505156	2.2683345860624935	3.4045008655510673
15	7.5	4.83131425261837	4.692643898355563	2.63610007516375	3.981534910559723
16	8.0	5.622858246054347	5.282645266707986	2.9904434661226245	5.077899596076168
17	8.5	6.404749263960616	5.994188526767388	3.350155696338452	5.770340450086555
18	9.0	7.04184564892128	6.672730346032181	3.760871899495329	6.116560877091748
19	9.5	7.794777740238429	7.379444126950909	4.14742832599592	7.212925562608194
20	10.0	8.562189294850137	8.115939695903798	4.587673145066037	7.789959607616849
21	10.5	9.440610068053477	8.868533528658935	4.998389348222915	8.366993652625505
22	11.0	10.415560596553888	9.708862899136328	5.532588854289703	9.232544720138486
23	11.5	11.231237028814132	10.516190828819113	6.021153226672394	10.559723023658394
24	12.0	12.211014045079397	11.34444650144482	6.54998389348223	11.309867282169646
25	12.5	13.142526183696123	12.118772990332992	7.057339203264254	12.233121754183497
26	13.0	13.943723152661807	12.962322013570837	7.588854289702566	12.925562608193882
27	13.5	14.870408803513682	13.79218751257677	8.08278750134221	13.84881708020773
28	14.0	15.869491770838358	14.668737976609226	8.702888435520242	14.829774956722447
29	14.5	17.071287224286884	15.51309191303718	9.23708794158703	15.926139642238892
30	15.0	17.891790144311983	16.37193428688716	9.798131643938582	16.676283900750143
31	15.5	18.789516868574736	17.2412405322086	10.431654676258994	17.59953837276399
32	16.0	19.947873932139583	18.170110353598364	11.030280253409215	18.349682631275243
33	16.5	21.048313142526183	19.065173821003405	11.653065607215723	19.099826889786495
34	17.0	22.018437183261742	19.92562602123361	12.254375603994418	20.138488170802074
35	17.5	22.940296346348763	20.805396138026516	12.87447653817245	21.23485285631852
36	18.0	24.0890004343839	21.719777521994253	13.534843766777623	22.1004039238315
37	18.5	25.097736377238284	22.65830630166537	14.146891442070226	23.023658395845352
38	19.0	26.169216661035765	23.598444907716708	14.817996349189306	23.9469128678592
39	19.5	27.173126116125296	24.474190458559047	15.521314291850102	24.58165031736872
40	20.0	28.239779912157925	25.35396057535195	16.15215290454204	25.620311598384298
41	20.5	29.21955692842319	26.217632428342608	16.94942553419951	26.65897287939988
42	21.0	30.387566967517742	27.075669889002473	17.521206915064965	27.466820542411995
43	21.5	31.526618080023173	28.048005022658305	18.186942982927093	28.9671090594345
44	22.0	32.57879241276124	28.89799335141705	18.909051862987226	30.06347374495094
45	22.5	33.655099184323575	29.753616072506585	19.566734671963925	30.986728216964792
46	23.0	34.69762054153193	30.589920877033418	20.310318909051865	32.08309290248123
47	23.5	35.71600945991602	31.488203997198905	20.981423816170945	33.06405077899595
48	24.0	36.869540035716014	32.35670532933023	21.665950821432407	34.1604154645124
49	24.5	37.897581929629816	33.23245088017258	22.382690862235588	34.679746105020186
50	25.0	39.017327091075835	34.14200278499964	23.150434875979816	35.31448355452971
51	25.5	39.98745113181139	35.01694342265187	23.74637603350156	36.75706866705134
52	26.0	40.890004343838996	35.925690414288816	24.436271878019973	37.44950952106173
53	26.5	42.12075872387665	36.760385392435424	25.153011918823154	38.31506058857471
54	27.0	43.17293305661471	37.65947342579103	25.78385053151509	38.94979803808423
55	27.5	44.18649548723395	38.47565540056505	26.428111242349406	39.98845931909981
56	28.0	45.20005791785318	39.36508447563931	27.118007086867824	40.680900173110196
57	28.5	46.237752787296685	40.133776572196695	27.708579405132618	41.89267166762837
58	29.0	47.10652058497032	40.90327358194419	28.32062708042522	42.931332948643956
59	29.5	48.02355326029249	41.656672327889446	28.948781273488677	43.681477207155204
60	30.0	49.02263622761716	42.43341355634796	29.58767314506604	44.835545297172516
61	30.5	50.00723973164728	43.21739900351748	30.226565016643402	45.81650317368723
62	31.0	50.996669723442245	43.965163357131935	30.903038763019435	46.45124062319675
63	31.5	51.90887591099956	44.720171929457415	31.504348759798134	47.316791690709735
64	32.0	52.74868478208408	45.41239727295412	32.140556211747025	48.06693594922099
65	32.5	53.59332014093344	46.098183310929926	32.82239879738001	48.64396999422965
66	33.0	54.54413823060958	46.77109073786393	33.55524535595404	49.50952106174263
67	33.5	55.350161687340126	47.51563543871794	34.156555352732745	50.375072129255614
68	34.0	56.31545924031083	48.24247204938948	34.89745517019221	51.18291979226773
69	34.5	57.08769728268739	48.94033178521697	35.51755610437024	52.16387766878244
70	35.0	57.990250494715	49.61323921215097	36.08665306560722	53.54875937680321
71	35.5	59.01346590086395	50.26602380933216	36.72554493718459	54.35660703981533
72	36.0	59.87740721077272	50.9276624516046	37.36175238913347	55.04904789382572
73	36.5	60.8040928616246	51.54664069480106	38.01943519811017	55.74148874783611
74	37.0	61.67768714706309	52.210694076643826	38.59658541823258	56.4339296018465
75	37.5	62.32443650755346	52.76688909101153	39.16031354021261	57.126370455856886
76	38.0	63.12563347651914	53.3601101121244	39.772361215505214	57.81881130986728
77	38.5	63.80616825136348	53.959770438758184	40.362933533770004	58.568955568378534
78	39.0	64.79559824315845	54.589212553426115	40.98840330720499	59.31909982688979
79	39.5	65.42786814035426	55.147017394174036	41.64608611618169	60.011540680900175
80	40.0	66.13253535402286	55.67826009964825	42.25813379147429	60.70398153491057
81	40.5	66.96269124957767	56.22882072168516	42.894341243423185	61.28101557991922
82	41.0	67.59013465900864	56.79386978114409	43.43390958874693	62.43508366993653
83	41.5	68.33341377479609	57.3315517921392	44.032535165897144	62.95441431044432
84	42.0	69.00912206187557	57.89579593840802	44.60968538601956	63.58915175995384
85	42.5	69.8778898595492	58.394842116277744	45.213679802426725	64.28159261396424
86	43.0	70.60186302427724	58.94057325917399	45.82304305809085	65.08944027697635
87	43.5	71.27757131135672	59.41869169410078	46.40556211747021	66.07039815349106
88	44.0	71.89536174525799	59.927396830251844	47.068613765703866	66.64743219849971
89	44.5	72.56624354457261	60.44495601149414	47.57865349511437	67.39757645701097
90	45.0	73.19368695400358	60.96171027954633	48.19070117040697	68.32083092902481
91	45.5	73.81147738790483	61.45270732551492	48.735638354987664	68.95556837853434
92	46.0	74.51131811380858	61.974291072707786	49.27520670031141	69.87882285054819
93	46.5	75.17254693759352	62.48702077480942	49.85235692043381	70.91748413156377
94	47.0	75.85790820020271	62.98767677905936	50.429507140556225	71.2060011540681
95	47.5	76.41778078092572	63.42393972810031	51.044239235477306	71.72533179457588
96	48.0	76.88112360635166	63.94552347529318	51.607967357457326	72.01384881708022
97	48.5	77.37342535836672	64.45261878506402	52.12337592612478	72.533179457588
98	49.0	77.88985954920604	64.98547131691846	52.62804681627833	73.28332371609926
99	49.5	78.29528452145374	65.52959263343448	53.234725652313976	73.97576457010965
100	50.0	78.73449490805541	65.99322263093924	53.78503167615162	74.55279861511829
101	50.5	79.29436748877842	66.4946835483793	54.367550735530976	74.84131563762263
102	51.0	79.834934118442	67.02431642747328	54.85611510791367	75.36064627813042
103	51.5	80.31275640716251	67.51128890749132	55.4654783635778	75.70686670513561
104	52.0	80.8340170857667	68.04414143934576	56.007731128530025	76.28390075014426
105	52.5	81.21048313142526	68.45947664544379	56.50166434016967	76.80323139065204
106	53.0	81.6738259568512	68.93598525399035	57.04391710512189	77.49567224466244
107	53.5	82.1323422945123	69.45434934842277	57.551272414903906	77.72648586266591
108	54.0	82.57637916887882	69.88578281832302	58.14721357242565	77.89959607616849
109	54.5	82.87079492253488	70.37999951705207	58.670675399978535	78.41892671667628
110	55.0	83.27621989478257	70.82350668480403	59.16460861161818	78.99596076168494
111	55.5	83.58994159949805	71.31208899120229	59.80081606356706	79.39988459319099
112	56.0	83.94227520633237	71.94394584544055	60.343068828519286	79.80380842469705
113	56.5	84.31391476422608	72.39952671104419	60.90142811124236	80.43854587420658
114	57.0	84.63728944447126	73.03379830485281	61.47857833136477	80.95787651471437
115	57.5	85.02340846565954	73.49823321554769	62.0664662300011	81.2463935372187
116	58.0	85.4433129012018	74.0495987507747	62.70267368194998	81.59261396422389
117	58.5	85.76668758144697	74.64764925102824	63.261032964673056	81.82342758222735
118	59.0	86.0755827983976	75.19257548073438	63.85428970256633	82.22735141373342
119	59.5	86.36034557652395	75.73669679725037	64.61129603779665	82.40046162723601
120	60.0	86.67406728123943	76.14639761101762	65.21797487383229	82.68897864974033
121	60.5	87.04570683913315	76.63176026465541	65.73338344249974	83.266012694749
122	61.0	87.38838747043775	77.13402609528558	66.38301299259102	83.66993652625506
123	61.5	87.76485351609634	77.60731505107171	66.91184365940084	84.2469705712637
124	62.0	88.05926926975239	78.1313135378349	67.59368624503384	84.4200807847663
125	62.5	88.37299097446787	78.5313553933208	68.00708686781918	84.88170802077322
126	63.0	88.73497755683188	78.9974001303959	68.50907333834427	85.401038661281
127	63.5	89.06317872484192	79.46746943342157	68.97347793407067	85.80496249278707
128	64.0	89.42999179497079	79.94075838920769	69.46741114571032	86.03577611079054
129	64.5	89.71475457309714	80.393924515241	69.90765596478042	86.72821696480092
130	65.0	89.9367730102804	80.79557619710711	70.47406850638893	87.18984420080784
131	65.5	90.24084173946618	81.21252122958535	71.02974336948353	87.36295441431044
132	66.0	90.47251315217913	81.65924805009777	71.4404595726404	87.70917484131563
133	66.5	90.72349051595153	82.0745832561958	72.1115644797595	88.05539526832082
134	67.0	91.01790626960758	82.48186933039268	72.57060023622894	88.22850548182342
135	67.5	91.31232202326365	82.9165224530534	73.12895951895202	88.51702250432774
136	68.0	91.57777885033059	83.36807875270648	73.60947063244929	88.80553952683208
137	68.5	91.87702109175152	83.76007147629126	74.11145710297436	89.03635314483554
138	69.0	92.17626333317243	84.22611621336637	74.57854611832924	89.44027697634161
139	69.5	92.46102611129878	84.61005980505	75.11811446365297	89.7864974033468
140	70.0	92.68304454848204	85.08978806635702	75.69794910340386	90.01731102135027
141	70.5	92.95332786331385	85.52605101539797	76.13014066358855	90.36353144835546
142	71.0	93.16086683720253	85.90275038837059	76.65897133039839	90.88286208886325
143	71.5	93.39736473768036	86.30681680980703	77.2575969075486	91.05597230236584
144	72.0	93.66282156474732	86.72295692909516	77.85890690432731	91.34448932487017
145	72.5	93.95723731840337	87.2099294091132	78.31525824116828	91.74841315637623
146	73.0	94.18408224335148	87.67275449342785	78.93535917534632	91.9792267743797
147	73.5	94.3385298518268	88.09291917866655	79.53130033286806	92.21004039238316
148	74.0	94.55089531348035	88.56701304764279	80.15677010630304	92.61396422388923
149	74.5	94.71982238525023	89.0073005626343	80.70707613014069	92.90248124639355
150	75.0	94.88392296925525	89.42263576873232	81.41576291205843	93.36410848240048
151	75.5	95.1059414064385	89.81221375274674	81.92580264146893	93.42181188690134
152	76.0	95.35209228244604	90.26859953154049	82.6559647804145	93.76803231390653
153	76.5	95.53549881751047	90.6509332968439	83.37807366047463	94.11425274091172
154	77.0	95.74786427916403	91.0775372876035	83.94985504134009	94.40276976341606
155	77.5	95.8974853998745	91.46470053204759	84.59680017180288	94.6912867859204
156	78.0	96.10019788599834	91.89935365470832	85.17663481155377	95.03750721292559
157	78.5	96.2498190067088	92.32756747184814	85.75378503167617	95.26832083092906
158	79.0	96.39461363965441	92.6938029733493	86.19671427037477	95.44143104443165
159	79.5	96.62628505236738	93.16145753680463	86.7846021690111	95.67224466243512
160	80.0	96.81451807519666	93.56310921867075	87.23558466659512	96.07616849394117
161	80.5	96.97379217143684	94.04766695911843	87.8261569848599	96.13387189844204
162	81.0	97.12823977991215	94.48312499496927	88.37377858906908	96.13387189844204
163	81.5	97.29234036391718	94.96607290903674	88.85160528293787	96.42238892094636
164	82.0	97.48057338674646	95.39509163936667	89.40996456566094	96.48009232544723
165	82.5	97.65915343404605	95.76937627276895	89.8448405454741	96.82631275245242
166	83.0	97.82325401805106	96.21529818009125	90.30656072157203	97.11482977495676
167	83.5	97.94874269993726	96.55658137269893	90.94276817352092	97.34564339296023
168	84.0	98.15628167382596	96.91879230824954	91.5682379469559	97.69186381996542
169	84.5	98.33486172112553	97.38322721894441	92.07559325673792	97.92267743796889
170	85.0	98.41691201312804	97.67541070695523	92.87018146676691	98.09578765147148
171	85.5	98.54240069501424	98.03440198974539	93.90905186298724	98.32660126947495
172	86.0	98.66788937690042	98.31692651947486	94.4244604316547	98.3843046739758
173	86.5	98.81268400984602	98.58898717773286	95.64855578223991	98.61511829197927
174	87.0	98.9719581060862	98.89968366911627	96.10222269945241	98.78822850548187
175	87.5	99.13123220232637	99.06952035222999	96.70890153548805	98.96133871898446
176	88.0	99.25672088421256	99.30857956969339	97.1786749704714	99.07674552798619
177	88.5	99.3870360538636	99.4252919822597	97.6913991195104	99.24985574148877
178	89.0	99.54148366233892	99.5685665300997	98.2121765274348	99.48066935949225
179	89.5	99.63318692987113	99.66354628653296	98.69537206056054	99.59607616849398
180	90.0	99.7200637096385	99.7504769110651	98.92891656823798	99.7114829774957
181	90.5	99.79728751387616	99.80440609480264	99.2778911199399	99.82688978649743
182	91.0	99.8552053670544	99.85511562577973	99.44164071727695	99.94229659549916
183	91.5	99.9179497079975	99.89616619847547	99.62686567164182	99.94229659549916
184	92.0	99.94208214682176	99.92916763927008	99.75840223343717	99.94229659549916
185	92.5	99.95656161011632	99.94848555583278	99.82282830452061	100.00000000000003
186	93.0	99.98069404894059	99.96699855920536	99.87651669709014	100.00000000000003
187	93.5	99.98552053670544	99.9822919098175	99.92215183077423	100.00000000000003
188	94.0	99.99517351223514	99.98953612852851	99.96241812520138	100.00000000000003
189	94.5	99.99517351223514	99.99678034723952	99.98120906260071	100.00000000000003
190	95.0	99.99517351223514	99.99919508680986	99.99194674111462	100.00000000000003
191	95.5	99.99517351223514	99.99919508680986	99.99731558037158	100.00000000000003
192	96.0	99.99517351223514	99.99919508680986	100.00000000000004	100.00000000000003
193	96.5	100.0	99.99999999999997	100.00000000000004	100.00000000000003
194	97.0	100.0	99.99999999999997	100.00000000000004	100.00000000000003
195	97.5	100.0	99.99999999999997	100.00000000000004	100.00000000000003
196	98.0	100.0	99.99999999999997	100.00000000000004	100.00000000000003
197	98.5	100.0	99.99999999999997	100.00000000000004	100.00000000000003
198	99.0	100.0	99.99999999999997	100.00000000000004	100.00000000000003
199	99.5	100.0	99.99999999999997	100.00000000000004	100.00000000000003
200	100.0	100.0	99.99999999999997	100.00000000000004	100.00000000000003
