# Supplementary material
Source: ML conference proceedings conference paper supplement (https://proceedings.neurips.cc/paper_files/paper/2022/hash/4937610670be26d651ecdb4f2206d95f-Abstract.html)
Supplement: Supplementary file 1 [file 4937610670be26d651ecdb4f2206d95f-Supplemental-Conference.zip › Fairness_Transferability/cov_states/CA_default.csv]

	Score	Group_0	Group_1	Group_2	Group_3
0	0.0	100.0	100.0	100.0	100.0
1	0.5	100.0	100.0	100.0	100.0
2	1.0	100.0	100.0	100.0	100.0
3	1.5	100.0	98.73417721518987	100.0	100.0
4	2.0	100.0	100.0	100.0	100.0
5	2.5	97.36842105263158	97.90575916230367	100.0	100.0
6	3.0	94.87179487179486	99.08536585365853	98.21428571428571	100.0
7	3.5	100.0	96.26168224299066	98.0	100.0
8	4.0	98.68421052631578	98.6449864498645	100.0	100.0
9	4.5	97.9381443298969	96.34146341463415	97.01492537313433	100.0
10	5.0	95.50561797752809	97.07602339181285	97.97979797979798	91.66666666666666
11	5.5	98.9795918367347	97.52650176678446	95.57522123893806	100.0
12	6.0	97.84946236559139	96.24573378839591	98.05825242718447	100.0
13	6.5	97.3913043478261	96.43835616438356	98.88888888888889	100.0
14	7.0	99.23664122137404	96.26972740315638	93.85964912280701	100.0
15	7.5	99.27007299270073	95.39800995024875	96.35036496350365	100.0
16	8.0	96.34146341463415	95.22510231923602	92.42424242424242	100.0
17	8.5	95.67901234567901	92.98642533936652	93.28358208955224	100.0
18	9.0	98.48484848484848	94.54329774614472	96.07843137254902	100.0
19	9.5	98.07692307692307	95.44419134396355	95.83333333333334	94.73684210526315
20	10.0	94.33962264150944	92.89617486338798	94.51219512195121	100.0
21	10.5	96.7032967032967	92.72727272727272	96.73202614379085	100.0
22	11.0	95.54455445544554	93.29501915708812	94.47236180904522	100.0
23	11.5	97.0414201183432	93.419740777667	92.3076923076923	91.30434782608695
24	12.0	95.56650246305419	90.57337220602527	93.90862944162437	92.3076923076923
25	12.5	97.40932642487047	91.995841995842	91.53439153439153	87.5
26	13.0	96.3855421686747	91.88931297709924	93.93939393939394	75.0
27	13.5	92.1875	91.8525703200776	92.93478260869566	93.75
28	14.0	95.16908212560386	90.26629935720845	89.6103896103896	94.11764705882352
29	14.5	94.77911646586345	89.89513822688274	92.46231155778895	89.47368421052632
30	15.0	96.47058823529412	91.19025304592316	92.82296650717703	92.3076923076923
31	15.5	94.6236559139785	89.72222222222223	90.67796610169492	93.75
32	16.0	94.58333333333333	87.78162911611786	91.92825112107623	92.3076923076923
33	16.5	95.6140350877193	90.10791366906474	87.5	53.84615384615385
34	17.0	95.02487562189054	87.46492048643593	94.64285714285714	88.88888888888889
35	17.5	96.33507853403141	88.38060384263495	94.8051948051948	94.73684210526315
36	18.0	95.7983193277311	87.5	92.27642276422763	86.66666666666667
37	18.5	94.25837320574163	85.67753001715266	88.1578947368421	87.5
38	19.0	95.04504504504504	84.33219178082192	90.4	93.75
39	19.5	95.67307692307693	86.30514705882352	86.64122137404581	81.81818181818183
40	20.0	93.21266968325791	85.36139066788655	89.7872340425532	88.88888888888889
41	20.5	94.58128078817734	84.34296365330847	86.19528619528619	88.88888888888889
42	21.0	93.38842975206612	82.83302063789868	85.91549295774648	85.71428571428571
43	21.5	93.64406779661016	83.19536423841059	82.25806451612904	80.76923076923077
44	22.0	94.95412844036697	80.3030303030303	91.44981412639405	94.73684210526315
45	22.5	94.17040358744396	84.66603951081844	88.16326530612245	75.0
46	23.0	96.29629629629629	80.65447545717036	86.64259927797833	89.47368421052632
47	23.5	94.3127962085308	83.60215053763442	86.8	70.58823529411765
48	24.0	91.63179916317992	79.4253938832252	89.01960784313725	84.21052631578947
49	24.5	96.71361502347418	81.70955882352942	82.02247191011236	66.66666666666666
50	25.0	89.65517241379311	80.4424778761062	86.36363636363636	90.9090909090909
51	25.5	94.5273631840796	77.36890524379025	90.09009009009009	84.0
52	26.0	94.6524064171123	77.41364038972543	83.65758754863813	91.66666666666666
53	26.5	94.11764705882352	79.94214079074253	89.13857677902621	86.66666666666667
54	27.0	94.4954128440367	78.51387645478961	82.12765957446808	100.0
55	27.5	87.61904761904762	74.2603550295858	83.75	72.22222222222221
56	28.0	89.52380952380953	72.94117647058823	80.93385214007782	83.33333333333334
57	28.5	89.30232558139535	75.49738219895288	81.81818181818183	80.95238095238095
58	29.0	88.88888888888889	78.13807531380753	84.21052631578947	100.0
59	29.5	89.47368421052632	74.35897435897436	88.46153846153845	61.53846153846154
60	30.0	91.30434782608695	75.33678756476684	81.09243697478992	75.0
61	30.5	92.15686274509804	72.68993839835728	78.57142857142857	94.11764705882352
62	31.0	89.75609756097562	73.6275565123789	86.5079365079365	100.0
63	31.5	87.83068783068782	74.30703624733475	80.80357142857143	80.0
64	32.0	89.65517241379311	69.76744186046511	76.79324894514767	69.23076923076923
65	32.5	90.85714285714286	70.30516431924883	79.52755905511812	80.0
66	33.0	90.35532994923858	71.65071770334929	83.88278388278388	86.66666666666667
67	33.5	87.42514970059881	70.91891891891892	83.03571428571429	80.0
68	34.0	87.0	71.53931339977852	81.52173913043478	85.71428571428571
69	34.5	91.25	68.05074971164936	74.89177489177489	70.58823529411765
70	35.0	87.16577540106952	70.21531100478468	84.43396226415094	83.33333333333334
71	35.5	92.9245283018868	67.07768187422934	75.63025210084034	64.28571428571429
72	36.0	89.94413407821229	69.34306569343066	76.37130801687763	66.66666666666666
73	36.5	81.77083333333334	71.91157347204161	76.32653061224491	83.33333333333334
74	37.0	87.29281767955801	67.87878787878789	72.09302325581395	83.33333333333334
75	37.5	91.04477611940298	67.00434153400869	77.61904761904762	83.33333333333334
76	38.0	93.97590361445783	70.5563093622795	72.80701754385966	75.0
77	38.5	85.81560283687944	66.44295302013423	75.9090909090909	92.3076923076923
78	39.0	89.75609756097562	61.892583120204606	77.25321888412017	100.0
79	39.5	91.6030534351145	65.94516594516594	70.61224489795919	75.0
80	40.0	82.87671232876713	61.81818181818181	69.2982456140351	75.0
81	40.5	86.04651162790698	63.1578947368421	72.15189873417721	80.0
82	41.0	89.23076923076924	63.24786324786324	69.65174129353234	85.0
83	41.5	86.36363636363636	55.83832335329342	71.30044843049326	77.77777777777779
84	42.0	84.28571428571429	62.05420827389444	69.30232558139535	72.72727272727273
85	42.5	85.0	60.483870967741936	70.66666666666667	83.33333333333334
86	43.0	86.0	58.99705014749262	73.568281938326	85.71428571428571
87	43.5	86.42857142857143	63.2996632996633	70.04608294930875	82.35294117647058
88	44.0	79.6875	59.17721518987342	71.25506072874494	90.0
89	44.5	78.41726618705036	62.51944012441679	66.84210526315789	92.3076923076923
90	45.0	81.53846153846153	58.87850467289719	75.43859649122807	81.25
91	45.5	82.8125	60.983606557377044	66.00985221674877	90.9090909090909
92	46.0	79.3103448275862	58.79629629629629	76.61691542288557	68.75
93	46.5	81.75182481751825	55.57299843014128	65.58139534883722	88.88888888888889
94	47.0	79.5774647887324	55.78778135048231	70.69767441860465	60.0
95	47.5	81.89655172413794	55.535055350553506	65.50218340611353	88.88888888888889
96	48.0	80.20833333333334	56.018518518518526	68.0952380952381	80.0
97	48.5	83.33333333333334	56.34920634920635	73.4375	55.55555555555556
98	49.0	73.83177570093457	51.963746223564954	63.829787234042556	69.23076923076923
99	49.5	80.95238095238095	57.98816568047337	63.27433628318584	66.66666666666666
100	50.0	79.12087912087912	51.736111111111114	64.39024390243902	50.0
101	50.5	75.86206896551724	51.04333868378812	64.97695852534562	80.0
102	51.0	77.67857142857143	55.62310030395137	66.48351648351648	88.88888888888889
103	51.5	86.86868686868688	47.27272727272727	63.436123348017624	50.0
104	52.0	81.48148148148148	48.18731117824773	68.31683168316832	50.0
105	52.5	73.07692307692307	50.58139534883721	59.2391304347826	55.55555555555556
106	53.0	78.125	48.64864864864865	63.86138613861386	66.66666666666666
107	53.5	72.63157894736842	48.13664596273292	59.25925925925925	50.0
108	54.0	68.47826086956522	47.94776119402985	59.909909909909906	66.66666666666666
109	54.5	80.32786885245902	45.76547231270358	60.51282051282051	44.44444444444444
110	55.0	70.23809523809523	46.098003629764065	58.69565217391305	50.0
111	55.5	73.84615384615385	45.46952224052718	57.383966244725734	42.857142857142854
112	56.0	79.45205479452055	41.65605095541402	55.44554455445545	42.857142857142854
113	56.5	87.01298701298701	45.40636042402827	50.480769230769226	81.81818181818183
114	57.0	73.13432835820896	39.974619289340104	53.48837209302325	66.66666666666666
115	57.5	81.25	44.0207972270364	48.858447488584474	40.0
116	58.0	83.9080459770115	39.70802919708029	52.320675105485236	66.66666666666666
117	58.5	70.1492537313433	36.0699865410498	52.40384615384615	50.0
118	59.0	82.8125	40.76809453471196	45.248868778280546	57.14285714285714
119	59.5	72.88135593220339	32.98816568047337	50.70921985815603	33.33333333333333
120	60.0	73.84615384615385	36.93516699410609	46.017699115044245	60.0
121	60.5	79.22077922077922	34.82587064676617	44.79166666666667	80.0
122	61.0	71.83098591549296	38.141025641025635	36.77685950413223	42.857142857142854
123	61.5	71.7948717948718	38.435374149659864	52.28426395939086	70.0
124	62.0	68.85245901639344	31.182795698924732	47.24409448818898	66.66666666666666
125	62.5	73.84615384615385	39.436619718309856	52.5974025974026	62.5
126	63.0	74.66666666666667	30.7426597582038	39.037433155080215	55.55555555555556
127	63.5	75.0	38.86986301369863	53.75722543352601	14.285714285714285
128	64.0	69.73684210526315	34.69387755102041	46.19565217391305	50.0
129	64.5	71.1864406779661	34.280639431616336	46.34146341463415	50.0
130	65.0	71.73913043478261	32.86573146292585	49.763033175355446	37.5
131	65.5	73.01587301587301	34.16988416988417	44.927536231884055	66.66666666666666
132	66.0	56.25	33.153153153153156	39.869281045751634	83.33333333333334
133	66.5	61.53846153846154	31.007751937984494	37.6	83.33333333333334
134	67.0	70.49180327868852	31.818181818181817	49.122807017543856	33.33333333333333
135	67.5	80.32786885245902	27.40740740740741	35.09615384615385	40.0
136	68.0	61.81818181818181	32.79857397504456	42.45810055865922	100.0
137	68.5	56.451612903225815	32.03285420944558	39.57219251336899	25.0
138	69.0	69.35483870967742	29.70639032815199	39.6551724137931	57.14285714285714
139	69.5	59.32203389830508	31.446540880503143	37.81094527363184	33.33333333333333
140	70.0	60.86956521739131	30.536912751677853	42.592592592592595	25.0
141	70.5	55.35714285714286	27.490774907749078	44.099378881987576	50.0
142	71.0	48.837209302325576	28.418803418803417	43.14720812182741	22.22222222222222
143	71.5	53.06122448979592	26.294820717131472	36.771300448430495	33.33333333333333
144	72.0	47.27272727272727	25.72533849129594	37.5	60.0
145	72.5	42.62295081967213	25.785123966942148	37.05882352941177	57.14285714285714
146	73.0	51.06382978723404	24.52173913043478	36.36363636363637	50.0
147	73.5	59.375	23.18007662835249	25.225225225225223	50.0
148	74.0	61.36363636363637	21.39219015280136	27.038626609442062	42.857142857142854
149	74.5	42.857142857142854	19.195612431444243	33.170731707317074	80.0
150	75.0	58.82352941176471	21.511627906976745	28.030303030303028	75.0
151	75.5	34.78260869565217	20.041322314049587	35.26315789473684	100.0
152	76.0	43.13725490196079	18.51851851851852	33.455882352941174	33.33333333333333
153	76.5	42.10526315789473	20.210526315789473	26.394052044609666	83.33333333333334
154	77.0	36.36363636363637	18.867924528301888	28.638497652582164	20.0
155	77.5	58.06451612903226	19.95841995841996	22.40663900414938	80.0
156	78.0	59.523809523809526	19.074074074074073	27.77777777777778	33.33333333333333
157	78.5	45.16129032258064	15.601503759398497	29.30232558139535	25.0
158	79.0	43.333333333333336	17.36263736263736	28.484848484848484	33.33333333333333
159	79.5	54.166666666666664	13.59724612736661	19.17808219178082	50.0
160	80.0	41.02564102564102	15.631262525050099	23.214285714285715	42.857142857142854
161	80.5	42.42424242424242	15.946843853820598	28.18181818181818	0.0
162	81.0	31.25	12.754158964879853	25.98039215686275	0.0
163	81.5	29.411764705882355	14.166666666666666	19.101123595505616	60.0
164	82.0	30.76923076923077	12.570356472795496	20.673076923076923	0.0
165	82.5	40.54054054054054	14.838709677419354	24.691358024691358	50.0
166	83.0	55.88235294117647	12.093862815884476	25.0	0.0
167	83.5	38.46153846153847	14.38679245283019	18.143459915611814	50.0
168	84.0	39.53488372093023	9.555555555555555	18.4549356223176	33.33333333333333
169	84.5	27.027027027027028	9.185441941074524	20.634920634920633	0.0
170	85.0	35.294117647058826	10.743801652892563	15.202702702702704	0.0
171	85.5	42.30769230769231	10.538116591928251	9.560723514211885	0.0
172	86.0	38.46153846153847	8.831908831908832	13.541666666666666	100.0
173	86.5	26.666666666666668	9.763313609467456	10.526315789473683	25.0
174	87.0	27.27272727272727	6.476683937823833	20.118343195266274	33.33333333333333
175	87.5	36.36363636363637	7.5829383886255926	17.699115044247787	0.0
176	88.0	42.30769230769231	9.090909090909092	17.142857142857142	0.0
177	88.5	25.925925925925924	10.344827586206897	10.471204188481675	0.0
178	89.0	31.25	7.303370786516854	12.886597938144329	25.0
179	89.5	21.052631578947366	10.16949152542373	11.11111111111111	0.0
180	90.0	16.666666666666664	6.481481481481481	14.942528735632186	0.0
181	90.5	12.5	10.44776119402985	2.307692307692308	0.0
182	91.0	16.666666666666664	6.349206349206349	8.19672131147541	0.0
183	91.5	7.6923076923076925	15.686274509803921	1.4492753623188406	0.0
184	92.0	20.0	12.195121951219512	6.122448979591836	0.0
185	92.5	33.33333333333333	16.666666666666664	8.333333333333332	0.0
186	93.0	0.0	4.3478260869565215	5.0	0.0
187	93.5	0.0	0.0	17.647058823529413	0.0
188	94.0	50.0	11.11111111111111	6.666666666666667	0.0
189	94.5	0.0	0.0	14.285714285714285	0.0
190	95.0	0.0	33.33333333333333	0.0	0.0
191	95.5	0.0	0.0	0.0	0.0
192	96.0	0.0	0.0	0.0	0.0
193	96.5	0.0	0.0	0.0	0.0
194	97.0	0.0	0.0	0.0	0.0
195	97.5	0.0	0.0	0.0	0.0
196	98.0	0.0	0.0	0.0	0.0
197	98.5	0.0	0.0	0.0	0.0
198	99.0	0.0	0.0	0.0	0.0
199	99.5	0.0	0.0	0.0	0.0
200	100.0	0.0	0.0	0.0	0.0
