# Supplementary material
Source: ML conference proceedings conference paper supplement (https://proceedings.neurips.cc/paper_files/paper/2022/hash/4937610670be26d651ecdb4f2206d95f-Abstract.html)
Supplement: Supplementary file 1 [file 4937610670be26d651ecdb4f2206d95f-Supplemental-Conference.zip › Fairness_Transferability/cov_states/IL_cdf.csv]

	Score	Group_0	Group_1	Group_2	Group_3
0	0.0	0.0	0.0	0.0	0.0
1	0.5	0.0	0.02209334438000552	0.0	0.0
2	1.0	0.0	0.04234557672834392	0.07847533632286995	0.0
3	1.5	0.0	0.10494338580502624	0.11210762331838565	0.0
4	2.0	0.04084967320261438	0.20988677161005248	0.1681614349775785	0.0
5	2.5	0.20424836601307192	0.31114793335174445	0.3475336322869955	1.0752688172043012
6	3.0	0.44934640522875813	0.47868912823345305	0.7511210762331839	1.0752688172043012
7	3.5	0.8169934640522875	0.7290803645401822	1.0762331838565022	1.0752688172043012
8	4.0	1.2663398692810457	0.9757893767835772	1.390134529147982	1.0752688172043012
9	4.5	1.633986928104575	1.3145539906103285	1.7937219730941707	1.0752688172043012
10	5.0	2.287581699346405	1.5833563472337289	2.275784753363229	1.0752688172043012
11	5.5	2.6552287581699345	1.946055417472153	2.769058295964126	1.0752688172043012
12	6.0	2.9820261437908493	2.341894504280585	3.4529147982062782	1.0752688172043012
13	6.5	3.880718954248366	2.81321918438737	3.867713004484305	3.225806451612903
14	7.0	4.370915032679738	3.3011138727791587	4.6524663677130045	3.225806451612903
15	7.5	5.106209150326797	3.882905274785971	5.07847533632287	3.225806451612903
16	8.0	5.923202614379084	4.4168277639694375	5.739910313901345	3.225806451612903
17	8.5	7.148692810457516	5.096198103654607	6.356502242152466	4.301075268817205
18	9.0	7.802287581699346	5.707447298168093	6.894618834080718	4.301075268817205
19	9.5	8.741830065359476	6.379453189726594	7.399103139013453	5.376344086021506
20	10.0	9.681372549019606	7.093804658013439	8.172645739910314	7.526881720430109
21	10.5	10.702614379084967	7.728988308938598	8.91255605381166	8.60215053763441
22	11.0	11.601307189542483	8.478320905827118	9.652466367713005	9.677419354838712
23	11.5	12.377450980392156	9.096934548467273	10.358744394618835	9.677419354838712
24	12.0	13.316993464052288	9.88677161005247	10.986547085201796	10.752688172043014
25	12.5	13.929738562091504	10.683973119764335	11.872197309417041	10.752688172043014
26	13.0	15.155228758169937	11.501426861824541	12.769058295964127	10.752688172043014
27	13.5	16.013071895424837	12.29678725950474	13.508968609865473	11.827956989247316
28	14.0	17.116013071895424	13.138175457976617	14.349775784753366	11.827956989247316
29	14.5	18.137254901960784	13.904078063150141	15.134529147982065	11.827956989247316
30	15.0	19.281045751633986	14.684709564577004	16.34529147982063	11.827956989247316
31	15.5	20.1797385620915	15.487434410383871	17.286995515695068	11.827956989247316
32	16.0	21.20098039215686	16.222038111019053	18.21748878923767	13.978494623655918
33	16.5	22.38562091503268	16.98057626806591	19.439461883408075	15.053763440860218
34	17.0	23.16176470588235	17.915861180152813	20.381165919282513	18.27956989247312
35	17.5	24.183006535947708	18.753567154561352	21.401345291479824	19.35483870967742
36	18.0	25.408496732026144	19.57470312068489	22.544843049327355	20.43010752688172
37	18.5	26.51143790849673	20.495259136518452	23.565022421524667	22.580645161290324
38	19.0	27.736928104575163	21.49866519377704	24.47309417040359	22.580645161290324
39	19.5	28.676470588235297	22.391604529135595	25.470852017937222	22.580645161290324
40	20.0	29.49346405228759	23.238516063702473	26.513452914798208	24.731182795698928
41	20.5	30.392156862745107	24.17011875172604	27.443946188340806	26.88172043010753
42	21.0	31.53594771241831	25.086992543496272	28.35201793721973	29.03225806451613
43	21.5	32.3529411764706	26.033324127773177	29.383408071748878	31.182795698924732
44	22.0	33.45588235294119	26.95388014360674	30.280269058295968	31.182795698924732
45	22.5	34.3137254901961	27.83761391880696	31.03139013452915	32.25806451612903
46	23.0	35.29411764705884	28.8097210715272	31.838565022421527	32.25806451612903
47	23.5	36.56045751633989	29.757893767835768	32.75784753363229	32.25806451612903
48	24.0	37.94934640522878	30.71711313633434	33.60986547085202	32.25806451612903
49	24.5	38.92973856209153	31.714995857497925	34.383408071748875	33.33333333333333
50	25.0	40.19607843137257	32.738654147104846	35.20179372197309	33.33333333333333
51	25.5	41.1356209150327	33.675780171223415	36.0762331838565	33.33333333333333
52	26.0	42.19771241830068	34.62579397956365	37.0067264573991	33.33333333333333
53	26.5	43.46405228758173	35.47822885022553	37.656950672645735	34.40860215053763
54	27.0	44.5261437908497	36.48899935561078	38.38565022421524	35.48387096774193
55	27.5	45.343137254902	37.350639786430996	39.00224215246636	35.48387096774193
56	28.0	46.32352941176474	38.300653594771234	39.63004484304932	39.784946236559136
57	28.5	47.3447712418301	39.17334069778145	40.49327354260089	43.01075268817204
58	29.0	48.651960784313765	40.018411120316664	41.35650224215246	44.08602150537634
59	29.5	49.42810457516343	40.86532265488354	41.99551569506726	44.08602150537634
60	30.0	50.69444444444448	41.74353309398876	42.71300448430493	44.08602150537634
61	30.5	51.51143790849676	42.59965018871397	43.430493273542595	44.08602150537634
62	31.0	52.369281045751656	43.400533922489174	43.95739910313901	45.16129032258064
63	31.5	52.85947712418303	44.19037098407437	44.78699551569507	48.38709677419354
64	32.0	53.88071895424839	44.971002485501224	45.493273542600896	49.46236559139784
65	32.5	54.65686274509805	45.71849397035808	46.35650224215247	50.53763440860214
66	33.0	55.433006535947726	46.48071435146827	47.02914798206279	51.61290322580644
67	33.5	56.086601307189554	47.30921476571848	47.60089686098655	51.61290322580644
68	34.0	56.617647058823536	48.130350731842015	48.12780269058297	55.91397849462364
69	34.5	57.59803921568628	48.980944490472226	48.75560538116592	56.98924731182794
70	35.0	58.864379084967325	49.79287489643743	49.47309417040359	56.98924731182794
71	35.5	59.84477124183007	50.48145079628094	50.235426008968616	56.98924731182794
72	36.0	60.498366013071895	51.10742888704776	50.76233183856503	59.13978494623654
73	36.5	61.15196078431372	51.80152812298626	51.14349775784754	61.29032258064514
74	37.0	62.17320261437907	52.482739574703096	51.80493273542602	61.29032258064514
75	37.5	62.90849673202613	53.10503544140659	52.48878923766818	61.29032258064514
76	38.0	64.01143790849672	53.80097578937676	53.183856502242165	62.36559139784944
77	38.5	64.86928104575162	54.454570560618585	53.78923766816145	62.36559139784944
78	39.0	66.09477124183005	55.04372641075207	54.50672645739911	62.36559139784944
79	39.5	66.74836601307187	55.66049894136056	55.201793721973104	63.44086021505374
80	40.0	67.64705882352938	56.229402559145704	55.85201793721974	63.44086021505374
81	40.5	68.38235294117644	56.85722176194419	56.434977578475355	63.44086021505374
82	41.0	68.99509803921565	57.402190923317654	56.973094170403606	63.44086021505374
83	41.5	69.52614379084963	58.02632790205281	57.567264573991054	63.44086021505374
84	42.0	70.05718954248363	58.56945595139461	58.08295964125563	64.51612903225804
85	42.5	71.20098039215682	59.07023842400807	58.64349775784755	65.59139784946234
86	43.0	72.09967320261434	59.5783853447482	59.11434977578477	66.66666666666664
87	43.5	72.75326797385617	60.15097118659667	59.585201793721986	66.66666666666664
88	44.0	73.57026143790844	60.72539814047681	59.9663677130045	67.74193548387095
89	44.5	74.3055555555555	61.24643284543861	60.43721973094171	67.74193548387095
90	45.0	75.28594771241825	61.78035533462209	60.96412556053813	69.89247311827954
91	45.5	75.735294117647	62.260885574887205	61.34529147982064	70.96774193548384
92	46.0	76.51143790849667	62.71932247077232	61.80493273542602	70.96774193548384
93	46.5	77.00163398692804	63.17591825462577	62.36547085201794	72.04301075268815
94	47.0	77.77777777777771	63.61042069409921	62.88116591928252	72.04301075268815
95	47.5	78.47222222222216	64.05965202982598	63.3968609865471	72.04301075268815
96	48.0	78.75816993464045	64.6414434318328	63.87892376681615	72.04301075268815
97	48.5	79.00326797385614	65.14406701647792	64.4730941704036	72.04301075268815
98	49.0	79.49346405228751	65.69824173800973	64.97757847533634	73.11827956989244
99	49.5	79.90196078431366	66.23952867531987	65.39237668161437	73.11827956989244
100	50.0	80.14705882352933	66.68139556291997	65.96412556053812	74.19354838709674
101	50.5	80.67810457516332	67.22452361226178	66.49103139013454	75.26881720430104
102	51.0	81.04575163398685	67.75844610144524	66.89461883408072	76.34408602150535
103	51.5	81.65849673202607	68.22792966952036	67.42152466367713	76.34408602150535
104	52.0	81.86274509803914	68.8134032955905	67.84753363228701	76.34408602150535
105	52.5	82.43464052287574	69.22028905458893	68.30717488789239	76.34408602150535
106	53.0	82.55718954248358	69.66952039031571	68.60986547085203	76.34408602150535
107	53.5	82.84313725490188	70.17582619902417	69.04708520179373	76.34408602150535
108	54.0	83.21078431372541	70.61401086256095	69.4730941704036	76.34408602150535
109	54.5	83.57843137254893	71.14425112768107	69.93273542600899	78.49462365591394
110	55.0	84.0686274509803	71.54745466261619	70.42600896860988	79.56989247311824
111	55.5	84.51797385620907	72.101629384148	71.03139013452916	80.64516129032255
112	56.0	84.80392156862736	72.73681303507315	71.55829596412558	80.64516129032255
113	56.5	85.13071895424828	73.22286661143328	71.87219730941705	80.64516129032255
114	57.0	85.41666666666657	73.88014360673844	72.35426008968611	80.64516129032255
115	57.5	85.66176470588226	74.39381386357357	73.1053811659193	81.72043010752684
116	58.0	85.78431372549011	74.96271748135872	73.66591928251121	82.79569892473114
117	58.5	86.0702614379084	75.54819110742886	74.1255605381166	82.79569892473114
118	59.0	86.31535947712409	76.02872134769399	74.63004484304933	82.79569892473114
119	59.5	86.88725490196069	76.59210162938412	75.19058295964126	82.79569892473114
120	60.0	87.33660130718944	77.0247629568259	75.7847533632287	82.79569892473114
121	60.5	87.7859477124182	77.49792874896436	76.26681614349776	82.79569892473114
122	61.0	88.19444444444434	78.08524348706617	76.78251121076234	82.79569892473114
123	61.5	88.48039215686264	78.56025039123628	77.16367713004485	82.79569892473114
124	62.0	88.9297385620914	79.08680843229308	77.72421524663677	83.87096774193544
125	62.5	89.29738562091492	79.45687195065818	78.04932735426009	83.87096774193544
126	63.0	89.74673202614369	79.98895332780998	78.54260089686098	83.87096774193544
127	63.5	89.86928104575152	80.46764245604344	78.99103139013452	83.87096774193544
128	64.0	90.15522875816983	80.91319156770689	79.46188340807174	84.94623655913975
129	64.5	90.23692810457506	81.344011783117	79.95515695067263	84.94623655913975
130	65.0	90.44117647058812	81.69382306913376	80.34753363228698	84.94623655913975
131	65.5	90.56372549019596	82.14673662892386	80.8183856502242	84.94623655913975
132	66.0	90.80882352941165	82.5260057074473	81.13228699551568	86.02150537634404
133	66.5	91.17647058823518	82.93657369050906	81.59192825112106	86.02150537634404
134	67.0	91.33986928104564	83.26613274417748	81.86098654708519	86.02150537634404
135	67.5	91.62581699346394	83.68038295130258	82.17488789237667	86.02150537634404
136	68.0	91.78921568627439	84.10015649452268	82.45515695067263	86.02150537634404
137	68.5	92.03431372549008	84.4518088925711	82.92600896860985	86.02150537634404
138	69.0	92.27941176470577	84.91945134861454	83.28475336322869	86.02150537634404
139	69.5	92.60620915032668	85.25637485040963	83.6322869955157	86.02150537634404
140	70.0	92.89215686274498	85.7405873147381	84.01345291479821	89.24731182795695
141	70.5	92.97385620915021	86.13090306545152	84.30493273542601	90.32258064516124
142	71.0	93.17810457516327	86.53226548835495	84.71973094170403	90.32258064516124
143	71.5	93.54575163398681	86.90417011875171	85.07847533632287	91.39784946236554
144	72.0	93.91339869281033	87.27607474914846	85.65022421524664	92.47311827956985
145	72.5	94.0767973856208	87.67007272392523	85.98654708520179	92.47311827956985
146	73.0	94.24019607843125	88.091687379177	86.26681614349776	92.47311827956985
147	73.5	94.52614379084955	88.44702200128876	86.63677130044843	92.47311827956985
148	74.0	94.64869281045739	88.94964558593388	87.04035874439462	92.47311827956985
149	74.5	94.77124183006524	89.33075577648899	87.36547085201794	92.47311827956985
150	75.0	94.97549019607831	89.73027708736075	87.78026905829596	92.47311827956985
151	75.5	95.2614379084966	90.07640614931415	88.15022421524662	93.54838709677415
152	76.0	95.42483660130706	90.55325416551594	88.47533632286995	93.54838709677415
153	76.5	95.66993464052274	90.89938322746936	88.94618834080717	93.54838709677415
154	77.0	95.71078431372536	91.25471784958111	89.37219730941703	94.62365591397844
155	77.5	95.87418300653582	91.59348246340787	89.8878923766816	94.62365591397844
156	78.0	96.16013071895412	92.04639602319797	90.32511210762331	94.62365591397844
157	78.5	96.24183006535935	92.46248734235475	90.67264573991032	95.69892473118274
158	79.0	96.44607843137241	92.82334530056151	91.08744394618834	95.69892473118274
159	79.5	96.65032679738549	93.26889441222495	91.60313901345292	97.84946236559135
160	80.0	96.77287581699333	93.69050906747673	91.80493273542602	97.84946236559135
161	80.5	96.89542483660118	94.10475927460182	92.0627802690583	97.84946236559135
162	81.0	97.2630718954247	94.50612169750525	92.33183856502242	97.84946236559135
163	81.5	97.63071895424822	94.97008192948537	92.62331838565024	97.84946236559135
164	82.0	97.63071895424822	95.39169658473713	93.06053811659194	97.84946236559135
165	82.5	97.75326797385607	95.78385344748224	93.35201793721974	97.84946236559135
166	83.0	97.91666666666653	96.17969253429067	93.67713004484305	97.84946236559135
167	83.5	98.16176470588222	96.5700082850041	94.0695067264574	97.84946236559135
168	84.0	98.24346405228745	96.9842584921292	94.38340807174889	97.84946236559135
169	84.5	98.4068627450979	97.44637761207765	94.69730941704036	97.84946236559135
170	85.0	98.52941176470574	97.73174997698607	95.28026905829597	97.84946236559135
171	85.5	98.65196078431359	98.11838350363615	95.90807174887892	97.84946236559135
172	86.0	98.77450980392143	98.4129614287029	96.32286995515696	97.84946236559135
173	86.5	98.85620915032666	98.6817637853263	97.26457399103138	97.84946236559135
174	87.0	99.06045751633972	98.94504280585468	97.57847533632287	97.84946236559135
175	87.5	99.18300653594757	99.1512473534014	97.91479820627802	97.84946236559135
176	88.0	99.30555555555542	99.41268526189813	98.29596412556053	97.84946236559135
177	88.5	99.38725490196065	99.54708644020984	98.63228699551568	97.84946236559135
178	89.0	99.42810457516326	99.6778053944582	98.93497757847533	98.92473118279564
179	89.5	99.5506535947711	99.75329098775656	99.27130044843048	98.92473118279564
180	90.0	99.67320261437894	99.83798214121325	99.41704035874437	98.92473118279564
181	90.5	99.75490196078417	99.89321550216326	99.59641255605379	99.99999999999994
182	91.0	99.87745098039201	99.92267329466993	99.6860986547085	99.99999999999994
183	91.5	99.99999999999986	99.94844886311327	99.80941704035872	99.99999999999994
184	92.0	99.99999999999986	99.9631777593666	99.84304932735424	99.99999999999994
185	92.5	99.99999999999986	99.9797477676516	99.88789237668159	99.99999999999994
186	93.0	99.99999999999986	99.99079443984161	99.93273542600896	99.99999999999994
187	93.5	99.99999999999986	99.99079443984161	99.95515695067263	99.99999999999994
188	94.0	99.99999999999986	99.99631777593662	99.98878923766814	99.99999999999994
189	94.5	99.99999999999986	99.99631777593662	99.98878923766814	99.99999999999994
190	95.0	99.99999999999986	99.99999999999996	99.98878923766814	99.99999999999994
191	95.5	99.99999999999986	99.99999999999996	99.98878923766814	99.99999999999994
192	96.0	99.99999999999986	99.99999999999996	99.99999999999997	99.99999999999994
193	96.5	99.99999999999986	99.99999999999996	99.99999999999997	99.99999999999994
194	97.0	99.99999999999986	99.99999999999996	99.99999999999997	99.99999999999994
195	97.5	99.99999999999986	99.99999999999996	99.99999999999997	99.99999999999994
196	98.0	99.99999999999986	99.99999999999996	99.99999999999997	99.99999999999994
197	98.5	99.99999999999986	99.99999999999996	99.99999999999997	99.99999999999994
198	99.0	99.99999999999986	99.99999999999996	99.99999999999997	99.99999999999994
199	99.5	99.99999999999986	99.99999999999996	99.99999999999997	99.99999999999994
200	100.0	99.99999999999986	99.99999999999996	99.99999999999997	99.99999999999994
