# Supplementary material
Source: ML conference proceedings conference paper supplement (https://proceedings.neurips.cc/paper_files/paper/2022/hash/4937610670be26d651ecdb4f2206d95f-Abstract.html)
Supplement: Supplementary file 1 [file 4937610670be26d651ecdb4f2206d95f-Supplemental-Conference.zip › Fairness_Transferability/cov_states/IL_default.csv]

	Score	Group_0	Group_1	Group_2	Group_3
0	0.0	100.0	100.0	100.0	100.0
1	0.5	100.0	100.0	100.0	100.0
2	1.0	100.0	100.0	100.0	100.0
3	1.5	100.0	100.0	100.0	100.0
4	2.0	100.0	98.24561403508771	100.0	100.0
5	2.5	100.0	100.0	100.0	100.0
6	3.0	100.0	96.7032967032967	100.0	100.0
7	3.5	100.0	97.79411764705883	100.0	100.0
8	4.0	100.0	98.50746268656717	100.0	100.0
9	4.5	88.88888888888889	98.91304347826086	97.22222222222221	100.0
10	5.0	100.0	97.94520547945206	95.34883720930233	100.0
11	5.5	100.0	96.95431472081218	93.18181818181817	100.0
12	6.0	100.0	95.81395348837209	93.44262295081968	100.0
13	6.5	95.45454545454545	96.875	89.1891891891892	50.0
14	7.0	100.0	95.47169811320755	97.14285714285714	100.0
15	7.5	100.0	95.88607594936708	97.36842105263158	100.0
16	8.0	95.0	95.86206896551724	96.61016949152543	100.0
17	8.5	93.33333333333333	95.9349593495935	96.36363636363636	100.0
18	9.0	100.0	94.87951807228916	89.58333333333334	100.0
19	9.5	95.65217391304348	93.15068493150685	93.33333333333333	100.0
20	10.0	100.0	96.1340206185567	88.40579710144928	100.0
21	10.5	100.0	95.65217391304348	90.9090909090909	100.0
22	11.0	100.0	92.62899262899262	96.96969696969697	100.0
23	11.5	84.21052631578947	92.85714285714286	88.88888888888889	100.0
24	12.0	95.65217391304348	94.17249417249417	87.5	100.0
25	12.5	93.33333333333333	90.76212471131639	96.20253164556962	100.0
26	13.0	93.33333333333333	93.24324324324324	92.5	100.0
27	13.5	95.23809523809523	91.66666666666666	95.45454545454545	100.0
28	14.0	96.29629629629629	88.18380743982495	92.0	100.0
29	14.5	100.0	89.1826923076923	98.57142857142858	100.0
30	15.0	96.42857142857143	90.56603773584906	89.81481481481481	100.0
31	15.5	100.0	90.13761467889908	92.85714285714286	100.0
32	16.0	96.0	85.96491228070175	93.97590361445783	100.0
33	16.5	96.55172413793103	88.59223300970875	90.82568807339449	100.0
34	17.0	89.47368421052632	87.5984251968504	89.28571428571429	66.66666666666666
35	17.5	88.0	88.35164835164835	91.20879120879121	0.0
36	18.0	96.66666666666667	85.87443946188341	85.29411764705883	0.0
37	18.5	77.77777777777779	87.0	89.01098901098901	50.0
38	19.0	100.0	85.3211009174312	83.9506172839506	100.0
39	19.5	100.0	87.21649484536083	94.3820224719101	100.0
40	20.0	100.0	86.08695652173914	87.09677419354838	50.0
41	20.5	90.9090909090909	82.80632411067194	87.95180722891565	100.0
42	21.0	100.0	85.14056224899599	85.18518518518519	50.0
43	21.5	95.0	82.68482490272373	85.86956521739131	50.0
44	22.0	96.29629629629629	81.6	90.0	100.0
45	22.5	95.23809523809523	86.66666666666667	85.07462686567165	100.0
46	23.0	95.83333333333334	78.4090909090909	83.33333333333334	100.0
47	23.5	87.09677419354838	86.40776699029125	91.46341463414635	100.0
48	24.0	100.0	79.27063339731286	90.78947368421053	100.0
49	24.5	95.83333333333334	80.81180811808119	78.26086956521739	100.0
50	25.0	90.32258064516128	80.39568345323741	86.3013698630137	100.0
51	25.5	95.65217391304348	77.99607072691552	85.8974358974359	100.0
52	26.0	92.3076923076923	78.29457364341084	91.56626506024097	100.0
53	26.5	87.09677419354838	81.8574514038877	87.93103448275862	100.0
54	27.0	96.15384615384616	80.87431693989072	90.76923076923077	100.0
55	27.5	100.0	77.99145299145299	89.0909090909091	100.0
56	28.0	83.33333333333334	75.7751937984496	75.0	100.0
57	28.5	84.0	79.32489451476793	80.51948051948052	100.0
58	29.0	90.625	76.03485838779956	85.71428571428571	0.0
59	29.5	78.94736842105263	76.73913043478261	89.47368421052632	100.0
60	30.0	93.54838709677419	73.16561844863732	85.9375	100.0
61	30.5	75.0	79.56989247311827	81.25	100.0
62	31.0	90.47619047619048	75.63218390804597	76.59574468085107	0.0
63	31.5	91.66666666666666	73.89277389277389	78.37837837837837	100.0
64	32.0	92.0	72.87735849056604	84.12698412698413	100.0
65	32.5	84.21052631578947	69.95073891625616	81.81818181818183	100.0
66	33.0	100.0	75.84541062801932	83.33333333333334	100.0
67	33.5	93.75	72.88888888888889	80.3921568627451	100.0
68	34.0	84.61538461538461	71.52466367713004	80.85106382978722	100.0
69	34.5	100.0	68.83116883116884	64.28571428571429	100.0
70	35.0	80.64516129032258	72.78911564625851	67.1875	100.0
71	35.5	87.5	70.32085561497327	73.52941176470588	100.0
72	36.0	81.25	75.0	74.46808510638297	100.0
73	36.5	93.75	69.49602122015915	85.29411764705883	100.0
74	37.0	80.0	70.0	84.7457627118644	100.0
75	37.5	88.88888888888889	72.7810650887574	83.60655737704919	100.0
76	38.0	88.88888888888889	64.02116402116403	75.80645161290323	100.0
77	38.5	71.42857142857143	69.01408450704226	79.62962962962963	100.0
78	39.0	83.33333333333334	57.1875	71.875	100.0
79	39.5	100.0	68.35820895522387	79.03225806451613	100.0
80	40.0	95.45454545454545	65.0485436893204	72.41379310344827	100.0
81	40.5	77.77777777777779	65.98240469208211	94.23076923076923	100.0
82	41.0	80.0	66.55405405405406	79.16666666666666	100.0
83	41.5	84.61538461538461	57.227138643067846	69.81132075471697	100.0
84	42.0	84.61538461538461	68.47457627118644	73.91304347826086	0.0
85	42.5	89.28571428571429	65.80882352941177	72.0	0.0
86	43.0	90.9090909090909	65.21739130434783	73.80952380952381	0.0
87	43.5	87.5	61.41479099678456	64.28571428571429	100.0
88	44.0	75.0	61.53846153846154	82.35294117647058	100.0
89	44.5	83.33333333333334	66.43109540636041	76.19047619047619	100.0
90	45.0	91.66666666666666	65.51724137931035	72.3404255319149	100.0
91	45.5	100.0	61.68582375478927	79.41176470588235	0.0
92	46.0	78.94736842105263	63.45381526104418	68.29268292682927	100.0
93	46.5	83.33333333333334	53.2258064516129	60.0	100.0
94	47.0	84.21052631578947	59.7457627118644	69.56521739130434	100.0
95	47.5	82.35294117647058	66.39344262295081	71.73913043478261	100.0
96	48.0	85.71428571428571	62.34177215189873	65.11627906976744	100.0
97	48.5	83.33333333333334	60.43956043956044	79.24528301886792	100.0
98	49.0	100.0	56.810631229235874	66.66666666666666	0.0
99	49.5	90.0	63.26530612244898	62.16216216216216	100.0
100	50.0	83.33333333333334	55.833333333333336	64.70588235294117	100.0
101	50.5	76.92307692307693	64.7457627118644	65.95744680851064	100.0
102	51.0	88.88888888888889	60.3448275862069	72.22222222222221	0.0
103	51.5	73.33333333333333	49.01960784313725	53.191489361702125	0.0
104	52.0	80.0	53.77358490566038	63.1578947368421	0.0
105	52.5	78.57142857142857	51.58371040723983	70.73170731707317	0.0
106	53.0	66.66666666666666	53.68852459016394	66.66666666666666	0.0
107	53.5	71.42857142857143	55.27272727272727	74.35897435897436	0.0
108	54.0	88.88888888888889	54.20168067226891	65.78947368421053	0.0
109	54.5	66.66666666666666	51.736111111111114	60.97560975609756	50.0
110	55.0	83.33333333333334	56.62100456621004	61.36363636363637	100.0
111	55.5	90.9090909090909	50.83056478405316	46.2962962962963	0.0
112	56.0	42.857142857142854	48.40579710144928	61.702127659574465	0.0
113	56.5	87.5	44.31818181818182	53.57142857142857	0.0
114	57.0	71.42857142857143	43.417366946778714	48.837209302325576	0.0
115	57.5	83.33333333333334	45.878136200716845	49.25373134328358	0.0
116	58.0	100.0	44.66019417475729	44.0	0.0
117	58.5	71.42857142857143	47.16981132075472	73.17073170731707	0.0
118	59.0	33.33333333333333	43.29501915708812	57.77777777777777	0.0
119	59.5	78.57142857142857	41.50326797385621	46.0	0.0
120	60.0	90.9090909090909	40.85106382978723	43.39622641509434	0.0
121	60.5	90.9090909090909	45.13618677042802	58.139534883720934	0.0
122	61.0	70.0	40.43887147335423	41.30434782608695	0.0
123	61.5	85.71428571428571	42.63565891472868	52.94117647058824	0.0
124	62.0	90.9090909090909	43.00699300699301	54.0	100.0
125	62.5	77.77777777777779	45.27363184079602	41.37931034482759	0.0
126	63.0	72.72727272727273	43.25259515570934	36.36363636363637	0.0
127	63.5	66.66666666666666	40.0	57.49999999999999	0.0
128	64.0	85.71428571428571	35.9504132231405	52.38095238095239	100.0
129	64.5	50.0	44.44444444444444	61.36363636363637	0.0
130	65.0	80.0	40.0	68.57142857142857	0.0
131	65.5	66.66666666666666	43.08943089430895	47.61904761904761	0.0
132	66.0	100.0	37.37864077669903	50.0	100.0
133	66.5	66.66666666666666	33.6322869955157	31.70731707317073	0.0
134	67.0	25.0	44.134078212290504	54.166666666666664	0.0
135	67.5	42.857142857142854	32.88888888888889	35.714285714285715	0.0
136	68.0	50.0	42.54385964912281	56.00000000000001	0.0
137	68.5	66.66666666666666	37.17277486910995	54.761904761904766	0.0
138	69.0	50.0	37.00787401574803	43.75	0.0
139	69.5	87.5	32.78688524590164	12.903225806451612	0.0
140	70.0	71.42857142857143	39.92395437262358	38.23529411764706	33.33333333333333
141	70.5	50.0	32.54716981132076	53.84615384615385	100.0
142	71.0	100.0	31.65137614678899	35.13513513513514	0.0
143	71.5	77.77777777777779	39.10891089108911	56.25	100.0
144	72.0	66.66666666666666	28.71287128712871	37.254901960784316	100.0
145	72.5	100.0	30.373831775700932	26.666666666666668	0.0
146	73.0	50.0	27.074235807860266	36.0	0.0
147	73.5	71.42857142857143	24.352331606217618	36.36363636363637	0.0
148	74.0	33.33333333333333	27.83882783882784	36.11111111111111	0.0
149	74.5	100.0	22.705314009661837	24.137931034482758	0.0
150	75.0	80.0	27.188940092165897	29.72972972972973	0.0
151	75.5	57.14285714285714	25.0	51.515151515151516	0.0
152	76.0	50.0	22.779922779922778	41.37931034482759	0.0
153	76.5	50.0	24.46808510638298	23.809523809523807	0.0
154	77.0	100.0	20.207253886010363	31.57894736842105	0.0
155	77.5	50.0	26.6304347826087	30.434782608695656	0.0
156	78.0	57.14285714285714	22.76422764227642	41.02564102564102	0.0
157	78.5	0.0	17.699115044247787	35.483870967741936	0.0
158	79.0	60.0	20.408163265306122	35.13513513513514	0.0
159	79.5	60.0	21.90082644628099	23.91304347826087	0.0
160	80.0	66.66666666666666	23.580786026200872	16.666666666666664	0.0
161	80.5	66.66666666666666	18.666666666666668	21.73913043478261	0.0
162	81.0	22.22222222222222	17.431192660550458	29.166666666666668	0.0
163	81.5	44.44444444444444	18.650793650793652	19.230769230769234	0.0
164	82.0	0.0	18.340611353711793	20.51282051282051	0.0
165	82.5	33.33333333333333	18.779342723004692	15.384615384615385	0.0
166	83.0	75.0	14.418604651162791	34.48275862068966	0.0
167	83.5	50.0	15.09433962264151	22.857142857142858	0.0
168	84.0	100.0	12.444444444444445	14.285714285714285	0.0
169	84.5	0.0	9.56175298804781	35.714285714285715	0.0
170	85.0	33.33333333333333	16.129032258064516	17.307692307692307	0.0
171	85.5	33.33333333333333	9.523809523809524	16.071428571428573	0.0
172	86.0	66.66666666666666	13.750000000000002	21.62162162162162	0.0
173	86.5	0.0	10.95890410958904	9.523809523809524	0.0
174	87.0	60.0	8.391608391608392	21.428571428571427	0.0
175	87.5	0.0	6.25	13.333333333333334	0.0
176	88.0	66.66666666666666	4.929577464788732	23.52941176470588	0.0
177	88.5	0.0	15.068493150684931	13.333333333333334	0.0
178	89.0	0.0	7.042253521126761	3.7037037037037033	0.0
179	89.5	66.66666666666666	4.878048780487805	6.666666666666667	0.0
180	90.0	33.33333333333333	2.1739130434782608	0.0	0.0
181	90.5	0.0	10.0	0.0	0.0
182	91.0	66.66666666666666	12.5	25.0	0.0
183	91.5	0.0	35.714285714285715	27.27272727272727	0.0
184	92.0	0.0	0.0	33.33333333333333	0.0
185	92.5	0.0	0.0	0.0	0.0
186	93.0	0.0	0.0	0.0	0.0
187	93.5	0.0	0.0	0.0	0.0
188	94.0	0.0	33.33333333333333	33.33333333333333	0.0
189	94.5	0.0	0.0	0.0	0.0
190	95.0	0.0	50.0	0.0	0.0
191	95.5	0.0	0.0	0.0	0.0
192	96.0	0.0	0.0	0.0	0.0
193	96.5	0.0	0.0	0.0	0.0
194	97.0	0.0	0.0	0.0	0.0
195	97.5	0.0	0.0	0.0	0.0
196	98.0	0.0	0.0	0.0	0.0
197	98.5	0.0	0.0	0.0	0.0
198	99.0	0.0	0.0	0.0	0.0
199	99.5	0.0	0.0	0.0	0.0
200	100.0	0.0	0.0	0.0	0.0
