# Supplementary material
Source: ML conference proceedings conference paper supplement (https://proceedings.neurips.cc/paper_files/paper/2022/hash/4937610670be26d651ecdb4f2206d95f-Abstract.html)
Supplement: Supplementary file 1 [file 4937610670be26d651ecdb4f2206d95f-Supplemental-Conference.zip › Fairness_Transferability/cov_states/main.py]

import os
import pickle

import itertools

import numpy as np
import pandas as pd

from scipy import optimize as opt
from opt_einsum import contract

from tqdm import tqdm

import matplotlib as mpl
import matplotlib.pyplot as plt

mpl.rcParams.update({
    'font.family': 'serif',
    'font.serif': 'Nimbus Roman',
    'mathtext.fontset': 'cm',
    'mathtext.rm': 'serif',
    'pdf.fonttype': 42,
    'ps.fonttype': 42
})

################################################################################

epsilon = 0.001

def dot(a, b):
    '''dot product'''
    return np.sum(a * b)


# G = Group (race, in this dataset)
# X = Credit score. 0-100 in source data. We divide by 100 for range 0-1
# Y = Whether loan was repaid. Y=0 indicates default on a loan

# We must represent (cumulative) probability (density) functions as datastructures.
# As a first approximation, we simply store them like a histogram, in which
# the data is binned by G (treated as a dictionary key), then by intervals in X.
# Distributions represented in this fashion are named with a leading underscore.

# _example[group_string][X_val]

# We distinguish cumulative distribution functions from density functions by
# naming the former with capitalized variables and the latter with lowercase

# Pr(G = g)
mu = pd.read_csv('totals.csv', index_col=0)
mu = (mu / mu.sum(axis=1)['SSA']).to_numpy()[:,:2] # limit to two groups

################################################################################
#//  _        _           _       _   _
#// | |_ __ _| |__  _   _| | __ _| |_(_) ___  _ __  ___
#// | __/ _` | '_ \| | | | |/ _` | __| |/ _ \| '_ \/ __|
#// | || (_| | |_) | |_| | | (_| | |_| | (_) | | | \__ \
#//  \__\__,_|_.__/ \__,_|_|\__,_|\__|_|\___/|_| |_|___/
#//

def get_density_from_cdf(df):
    '''
    Treats each bin

    assuming that df represents Pr(X <= x | G =g)
    '''

    density = {}

    for g in df.columns:
        out = []
        prev = 0

        for xi, x in enumerate(df.index):

            if (xi == 0):
                out.append(df[g][x])

            else:
                out.append(df[g][x] - df[g][prev_x])

            prev_x = x

        density[g] = out

    out_df = pd.DataFrame(density, index=df.index)

    # normalize and return
    return out_df / out_df.sum()

def main(state_1, state_2):

    # Pr(Y = 0 | G = g, X = x)
    _y0_xg = pd.read_csv(f'{state_1}_default.csv', index_col='Score') / 100 # convert from percentage
    _y0_xg = _y0_xg.drop('Unnamed: 0', axis=1)
    _y0_xg = _y0_xg.drop('Group_2', axis=1)
    _y0_xg = _y0_xg.drop('Group_3', axis=1)
    # print(_y0_xg)

    _y0_xg_R = pd.read_csv(f'{state_2}_default.csv', index_col='Score') / 100 # convert from percentage
    _y0_xg_R = _y0_xg_R.drop('Unnamed: 0', axis=1)
    _y0_xg_R = _y0_xg_R.drop('Group_2', axis=1)
    _y0_xg_R = _y0_xg_R.drop('Group_3', axis=1)

    # Pr(X <= x | G = g)
    _X_g = pd.read_csv(f'{state_1}_cdf.csv', index_col='Score') / 100 # convert from percentage
    _X_g = _X_g.drop('Unnamed: 0', axis=1)
    _X_g = _X_g.drop('Group_2', axis=1)
    _X_g = _X_g.drop('Group_3', axis=1)

    _X_g_R = pd.read_csv(f'{state_2}_cdf.csv', index_col='Score') / 100 # convert from percentage
    _X_g_R = _X_g_R.drop('Unnamed: 0', axis=1)
    _X_g_R = _X_g_R.drop('Group_2', axis=1)
    _X_g_R = _X_g_R.drop('Group_3', axis=1)

    # G values in the source data
    groups = list(_X_g.columns)

    # X values in source data
    idx = _X_g.index
    x_min = idx.min()
    x_max = idx.max()

    # ensure columns and indices agree for imported data
    assert all(_X_g.columns == _y0_xg.columns)
    assert all(idx == _y0_xg.index)

    # p(x | G = g)
    _x_g = get_density_from_cdf(_X_g)

    # p(Y = 1, X = x | G = g) = p(x | G) * Pr(Y = 1 | G = g, X = x)
    _xy1_g = _x_g * (1 - _y0_xg)

    # = p(Y = 0, X = x | G = g) = p(x | G) * Pr(Y = 0 | G = g, X = x)
    _xy0_g = _x_g * _y0_xg

    # p(X <= x, Y = 0 | G = g)
    _Xy0_g = _xy0_g.cumsum()

    # p(X <= x, Y = 1 | G = g)
    _Xy1_g = _xy1_g.cumsum()

    # shifted distribution
    _x_g_R = get_density_from_cdf(_X_g_R)
    _xy1_g_R = _x_g_R * (1 - _y0_xg_R)
    _xy0_g_R = _x_g_R * _y0_xg_R
    _Xy0_g_R = _xy0_g_R.cumsum()
    _Xy1_g_R = _xy1_g_R.cumsum()

    _Xy1_g_R = ((_x_g_R * (1 - _y0_xg)).cumsum())

    ################################################################################

    def discretize(phi):
        '''
        Get first x value such that phi <= x
        '''
        return idx[np.digitize(phi, idx, right=True)]

    def tp_phi(phi, _Xy1_g=_Xy1_g):
        '''
        True positive FRACTION given per-group X-threshold classifiers
        e.g., phi = np.array([0.5, 0.4, 0.6, 0.3])

        Pr(Y_hat = 1, Y = 1 | G = g)
        '''

        phi = discretize(phi)

        _tp = []
        for i, p in enumerate(phi):

            g = groups[i]

            _tp.append(
                # Pr( Y = 1, X > phi | g )
                _Xy1_g[g][x_max] - _Xy1_g[g][p]
            )

        return np.array(_tp)

    def fn_phi(phi, _Xy1_g=_Xy1_g):
        '''
        False negative FRACTION given per-group X-threshold classifiers
        e.g., phi = np.array([0.5, 0.4, 0.6, 0.3])

        Pr(Y_hat = -1, Y = 1 | G = g)
        '''

        phi = discretize(phi)

        _fn = []
        for i, p in enumerate(phi):
            g = groups[i]

            _fn.append(
                # Pr( Y = 1, X < phi | g )
                _Xy1_g[g][p]
            )

        return np.array(_fn)

    def ac_phi(phi, _X_g=_X_g):
        '''
        Acceptance rates given per-group X-threshold classifiers
        e.g., phi = np.array([0.5, 0.4, 0.6, 0.3])

        Pr( Y_hat = 1 | G = g )
        '''

        phi = discretize(phi)

        return np.array([
            (1 - _X_g[groups[i]][p]) for i, p in enumerate(phi)
        ])

    def fnr_phi(phi, _Xy1_g=_Xy1_g):
        '''
        False negative RATE given per-group X-threshold classifiers
        e.g., phi = np.array([0.5, 0.4, 0.6, 0.3])

        Pr( Y_hat = 0 | Y = 1, G = g )
        '''

        phi = discretize(phi)

        _fnr = []
        for i, p in enumerate(phi):
            g = groups[i]

            _fnr.append(
                # Pr( Y_hat = 0, Y = 1 | g ) / Pr( Y = 1 | g )
                _Xy1_g[g][p] / _Xy1_g[g][x_max]
            )

        return np.array(_fnr)

    def fpr_phi(phi, _Xy0_g=_Xy0_g):
        '''
        False positive RATE given per-group X-threshold classifiers
        e.g., phi = np.array([0.5, 0.4, 0.6, 0.3])

        Pr( Y_hat = 1 | Y = 0, G = g )
        '''

        phi = discretize(phi)

        _fpr = []
        for i, p in enumerate(phi):
            g = groups[i]

            _fpr.append(
                # 1 - [Pr( Y_hat = 0, Y = 0 | g ) / Pr( Y = 0 | g )]
                1 - ( _Xy0_g[g][p] / _Xy0_g[g][x_max] )
            )

        return np.array(_fpr)

    ################################################################################
    #//       _               _  __ _
    #//   ___| | __ _ ___ ___(_)/ _(_) ___ _ __
    #//  / __| |/ _` / __/ __| | |_| |/ _ \ '__|
    #// | (__| | (_| \__ \__ \ |  _| |  __/ |
    #//  \___|_|\__,_|___/___/_|_| |_|\___|_|
    #//

    def phi_ac(target_ac, _X_g=_X_g):
        '''
        Get X-thresholds for given target acceptance rate in each group
        e.g., target_ac = np.array([0.5, 0.4, 0.6, 0.3]) such that the actual
        acceptance rate is >= the target acceptance rate.
        '''

        # vectorized binary search
        l = np.ones(len(groups)) * x_min
        r = np.ones(len(groups)) * x_max
        c = (l + r) / 2

        current = ac_phi(c, _X_g=_X_g)
        while any( np.abs(current - target_ac) > epsilon ):
            l = np.where(
                current > target_ac, # accepting too many; threshold too low
                c,
                l
            )
            r = np.where(
                current < target_ac, # must accept more; lower threshold
                c,
                r
            )
            c = (l + r) / 2
            update = ac_phi(c, _X_g=_X_g)
            if all(update == current):
                break
            else:
                current = update

        return c

    def phi_fpr(target_fpr, _Xy0_g=_Xy0_g):
        '''
        Get X-thresholds for given target false positive rate in each group
        e.g., target_fpr = np.array([0.5, 0.4, 0.6, 0.3])
        '''

        # vectorized binary search
        l = np.ones(len(groups)) * x_min
        r = np.ones(len(groups)) * x_max
        c = (l + r) / 2

        current = fpr_phi(c, _Xy0_g=_Xy0_g)
        while any( (np.abs(current - target_fpr) > epsilon) & ((r - l) > epsilon) ):
            l = np.where(
                current > target_fpr, # too many false positives; raise threshold
                c,
                l
            )
            r = np.where(
                current < target_fpr, # not enough false positives; lower threshold
                c,
                r
            )
            c = (l + r) / 2
            update = fpr_phi(c, _Xy0_g=_Xy0_g)
            if all(update == current):
                break
            else:
                current = update

        return c

    def phi_fnr(target_fnr, _Xy1_g=_Xy1_g):
        '''
        Get X-thresholds for given target false negative rate in each group
        e.g., target_fnr = np.array([0.5, 0.4, 0.6, 0.3])
        '''

        # vectorized binary search
        l = np.ones(len(groups)) * x_min
        r = np.ones(len(groups)) * x_max
        c = (l + r) / 2

        current = fnr_phi(c, _Xy1_g=_Xy1_g)
        while any( (np.abs(current - target_fnr) > epsilon) & ((r - l) > epsilon) ):
            l = np.where(
                current < target_fnr, # not enough false negatives; raise threshold
                c,
                l
            )
            r = np.where(
                current > target_fnr, # too many false negatives; lower threshold
                c,
                r
            )
            c = (l + r) / 2
            update = fnr_phi(c, _Xy1_g=_Xy1_g)
            if all(update == current):
                break
            else:
                current = update

        return c


    ################################################################################
    #//                  _ _                _               _
    #//  ___  __ _ _ __ (_) |_ _   _    ___| |__   ___  ___| | __
    #// / __|/ _` | '_ \| | __| | | |  / __| '_ \ / _ \/ __| |/ /
    #// \__ \ (_| | | | | | |_| |_| | | (__| | | |  __/ (__|   <
    #// |___/\__,_|_| |_|_|\__|\__, |  \___|_| |_|\___|\___|_|\_\
    #//                        |___/

    # x = np.linspace(0, 1, 30)

    # plt.title('checking monotonicity')
    # plt.plot(x, [phi_ac(a) for a in x], label=groups)
    # plt.plot([ac_phi(a * np.ones(len(groups))) for a in x * 100], x * 100, label=groups)
    # plt.xlabel('Acceptance Rate')
    # plt.ylabel('Threshold')
    # plt.legend()
    # plt.show()

    # plt.title('checking inverse functions')
    # plt.plot(x, [phi_fnr(a) for a in x], label=[f'fnr {g}' for g in groups])
    # plt.plot(x, [phi_fpr(a) for a in x], label=[f'fpr {g}' for g in groups])
    # plt.plot([fnr_phi(a * np.ones(len(groups))) for a in x * 100], x * 100,
    #          label=[f'fnr {g}' for g in groups])
    # plt.plot([fpr_phi(a * np.ones(len(groups))) for a in x * 100], x * 100,
    #          label=[f'fpr {g}' for g in groups])
    # plt.xlabel('FPR or FNR')
    # plt.ylabel('Threshold')
    # plt.legend()
    # plt.show()

    # plt.title('checking monotonicity')
    # plt.plot(x, [fnr_phi(phi_ac(a)) for a in x], label=[f'fnr {g}' for g in groups])
    # plt.plot(x, [fpr_phi(phi_ac(a)) for a in x], label=[f'fpr {g}' for g in groups])
    # plt.xlabel('Acceptance Rate')
    # plt.ylabel('FPR or FNR')
    # plt.legend()
    # plt.show()

    ################################################################################

    # # Assume everyone applies for loans of equal amounts.
    # # All defaults yeild no profit
    # # All repaid loans yield the same profit (No partial repayments)
    # # Utility is maximized proportional to
    # # \sum_{y,y_hat} V_{y, y_hat} * Pr(Y_hat = y_hat | Y = y)

    # # classifier utility per outcome
    # V=np.array([
    #     [0.5, -0.5], # tn, fp
    #     [-0.25, 1.0] # fn, tp
    # ])

    # def u_phi(phi, V=V):
    #     '''
    #     Classifier utility for given group-specific thresholds
    #     '''

    #     _fpr = fpr_phi(phi)
    #     _fnr = fnr_phi(phi)
    #     u = 0
    #     u += dot(mu, (1 - _fpr)) * V[0,0] # tnr
    #     u += dot(mu, _fpr)       * V[0,1] # fpr
    #     u += dot(mu, _fnr)       * V[1,0] # fnr
    #     u += dot(mu, (1 - _fnr)) * V[1,1] # tpr
    #     return u

    # def dp_thresholds(_X_g=_X_g, V=V):
    #     '''
    #     Get Demographic Parity thresholds.
    #     Maximize utility, sweep over group-independent acceptance rates
    #     '''

    #     def obj(ac):
    #         '''negative utility as a function of acceptance rate'''
    #         return -u_phi(phi_ac(ac, _X_g=_X_g), V=V)

    #     sol = opt.minimize_scalar(
    #         obj, # objective function
    #         bounds=(0, 1),
    #         method='bounded'
    #     )

    #     return phi_ac(sol.x, _X_g=_X_g)

    # x = np.linspace(0, 1, 200)
    # plt.plot(x, [-u_phi(phi_ac(a)) for a in x])
    # plt.xlabel('Group-independent Acceptance Rate')
    # plt.ylabel('Negative Utility (to minimize)')
    # plt.show()

    # def eo_thresholds(_Xy1_g=_Xy1_g, V=V):
    #     '''
    #     Get Equal Opportunity thresholds
    #     Maximize utility, sweep over group-independent false negative rates
    #     (true positive rates)
    #     '''

    #     def obj(fnr):
    #         '''negative utility as a function of acceptance rate'''
    #         return -u_phi(phi_fnr(fnr, _Xy1_g=_Xy1_g), V=V)

    #     sol = opt.minimize_scalar(
    #         obj, # objective function
    #         bounds=(0, 1),
    #         method='bounded'
    #     )

    #     return phi_fnr(sol.x, _Xy1_g=_Xy1_g)

    # x = np.linspace(0, 1, 200)
    # plt.plot(x, [-u_phi(phi_fnr(a)) for a in x])
    # plt.xlabel('Group-independent False Negative Rate')
    # plt.ylabel('Negative Utility (to minimize)')
    # plt.show()

    ################################################################################
    #//                           _       _
    #//   ___ _____   ____ _ _ __(_) __ _| |_ ___
    #//  / __/ _ \ \ / / _` | '__| |/ _` | __/ _ \
    #// | (_| (_) \ V / (_| | |  | | (_| | ||  __/
    #//  \___\___/ \_/ \__,_|_|  |_|\__,_|\__\___|
    #//      _     _  __ _
    #//  ___| |__ (_)/ _| |_
    #// / __| '_ \| | |_| __|
    #// \__ \ | | | |  _| |_
    #// |___/_| |_|_|_|  \__|
    #//

    def p_manipulate(x, phi, theta):
        '''

        Probability of manipulation given feature x, threshold phi

        probability of manipulating ~= 1 - |x' - x| * theta to left of threshold

        theta = 100000 => nobody manipulates;
        theta = 0.0001 => everyone manipulates;

        Args:
            x: array of indices to calculate
        '''
        return np.where(
            x > phi,
            0,
            np.maximum(0, 1 - (phi - x) * theta)
        )

    def manipulation_resamples_from(x, x_new, phi, theta):
        '''
        Given a manipulator with original feature x, its new feature
        will be sampled from the following density function:

        Pr(X_new=x_new | X=x, Manip=True, G=g)

        (uniform b/w threshold and max of domain)

        x is original feature
        x_new is new feature
        phi is decision threshold
        1/theta is manipulation budget

        Resulting distribution is renormalized after this function is called
        '''

        x = np.array(x).reshape(len(x), 1, 1)
        x_new = np.array(x_new).reshape(1, len(x_new), 1)
        phi = np.array(phi).reshape(1, 1, len(phi))

        # depends on original feature
        ub = np.maximum(phi, np.minimum(x_max, phi + (1 / theta)))

        zero = np.zeros((len(x), len(x_new), len(phi)))
        one = np.ones((len(x), len(x_new), len(phi)))

        # indexed by X, then X_new, then G
        dist = np.where(
            x_new < phi,
            zero,
            np.where(
                x_new > ub,
                zero,
                one
            )
        )
        s = contract('xng->xg', dist) # sum over x_new for normalization

        # Pr(X_new=x_new | X=x, Manip=True, G=g)
        return np.where(
            s == 0,
            zero,
            dist / s
        )

    def eo_dot(a, b, _y0_xg=_y0_xg):
        '''
        dot product

        a, b are dataframes with matching columns and index to _y0_xg
        '''
        return ((1 - _y0_xg) * a * b).sum().to_numpy()

    def covariate_shift(phi, _x_g=_x_g):
        '''
        Given classifier X-thresholds, what is realized version of _x_g,
        _x_g_R?

        Uses p_manipulate

        Returns function of theta, a shift parameter
        '''

        def of_theta(theta):

            # Pr(Y_hat = 0 -> Y_hat = 1 | X = x, G = g)
            # probability of manipulation
            # as numpy array indexed by X, then G
            manip = np.array([p_manipulate(x, phi, theta) for x in idx])

            array_x_g = _x_g.to_numpy() # X, G

            # Pr(X_new=x_new | X=x, Manip=True)
            # indexed by X, then X_new, then G
            resample = manipulation_resamples_from(idx, idx, phi, theta)

            # Pr(X_new=x_new, Manip=True | G=g)
            # = sum_x Pr(X_new=x_new | X=x, Manip=True, G=g) Pr(Manip=True | X=x, G) Pr(X=x | G=g)
            resample_dist = contract('xng,xg,xg->ng', resample, manip, _x_g)

            # indexed by X, G
            return _x_g * (1 - manip) + resample_dist

        return of_theta

    ################################################################################
    #//  _____                  _
    #// | ____|__ _ _   _  __ _| |
    #// |  _| / _` | | | |/ _` | |
    #// | |__| (_| | |_| | (_| | |
    #// |_____\__, |\__,_|\__,_|_|
    #//          |_|
    #//   ___                         _               _ _
    #//  / _ \ _ __  _ __   ___  _ __| |_ _   _ _ __ (_) |_ _   _
    #// | | | | '_ \| '_ \ / _ \| '__| __| | | | '_ \| | __| | | |
    #// | |_| | |_) | |_) | (_) | |  | |_| |_| | | | | | |_| |_| |
    #//  \___/| .__/| .__/ \___/|_|   \__|\__,_|_| |_|_|\__|\__, |
    #//       |_|   |_|                                     |___/


    def div_eo(_x_g, _x_g_R, _y0_xg=_y0_xg):
        '''
        Get divergence b/w distributions _x_g and _x_g_R, as defined for Equal opportunity
        analysis and bounds
        '''

        # Divergence of distributions for EO case
        eo_div2 = np.maximum(
            0, # the negative values are caused by floating point round errors
            (
                eo_dot(_x_g, _x_g, _y0_xg=_y0_xg) +
                eo_dot(_x_g_R, _x_g_R, _y0_xg=_y0_xg) -
                2 * eo_dot(_x_g, _x_g_R, _y0_xg=_y0_xg)
            )
        )

        return np.sqrt(eo_div2)

    def eo_violation(tpr):
        '''
        Sum of group-pairwise differences is tpr

        tpr is array (one entry per group)
        '''
        x = tpr.reshape((1, len(tpr)))
        return np.sum(np.abs(x - x.T)) / 2

    def bound_eo(phi, _x_g=_x_g, _y0_xg=_y0_xg):
        '''
        (assumes that policy is fair on source distribution)

        First, get maximum possible change in TPR per group
        as a function of the group-divergence bound B_g
        between _r = _x_g and _r_R = _x_g_R.

        Project ball of radius B_g around r vector to 1-t plane,
        extremize ratio of angles,
        convert to extremized TPR

        Return a bound on maximum possible violation of equal opportunity
        accounting for changes in all groups AS A FUNCTION of Bg.
        '''

        _r = _x_g
        _s = _y0_xg

        _s_inv = 1/_y0_xg

        # pr(Yhat = 1 | x, g)
        # depends on phi
        _t = pd.DataFrame({
            g: np.array([(1 if x >= phi[gi] else 0) for x in idx])
            for gi, g in enumerate(groups)
        }, index=idx)

        # before shift
        _tp = eo_dot(_t, _r) # = tp_phi(phi)
        _fn = eo_dot(1 - _t, _r) # = fn_phi(phi)

        norm_t = np.sqrt(eo_dot(_t, _t))
        norm_1 = np.sqrt(eo_dot(1, 1))
        norm_r = np.sqrt(eo_dot(_r, _r))
        norm_s_inv = np.sqrt(eo_dot(_s_inv, _s_inv))

        # unit vectors
        unit_t = _t / norm_t
        unit_r = _r / norm_r
        unit_1 = 1 / norm_1
        unit_s_inv = _s_inv / norm_s_inv


        basis_t = unit_t

        # projection of 1 in (1-t) plane, orthogonal to t
        # a la Gram-Schmidt
        ortho = 1 - unit_t * eo_dot(1, unit_t)
        # as unit vector
        basis_1 = ortho / np.sqrt(eo_dot(ortho, ortho))

        # check is close to zero
        # print(eo_dot(basis_t, ortho))

        # check is close to one
        # print(eo_dot(basis_1, basis_1))

        # project r into 1-t plane
        r_proj = (
            basis_t * eo_dot(_r, basis_t) +
            basis_1 * eo_dot(_r, basis_1)
        )
        norm_r_proj = np.sqrt(eo_dot(r_proj, r_proj))
        unit_r_proj = r_proj / norm_r_proj

        # should be the same
        # print(eo_dot(r_proj, basis_t))
        # print(eo_dot(_r, basis_t))

        # should be the same
        # print(eo_dot(r_proj, basis_1))
        # print(eo_dot(_r, basis_1))

        # should be the same
        # print(eo_dot(unit_r, _t) / eo_dot(unit_r, unit_1) )
        # print(eo_dot(unit_r_proj, _t) / eo_dot(unit_r_proj, unit_1) )

        # should be the same
        # print(eo_dot(unit_r, unit_t) / eo_dot(unit_r, unit_1) )
        # print(eo_dot(unit_r_proj, unit_t) / eo_dot(unit_r_proj, unit_1) )

        # angle between t and r_proj
        a_rt_proj = np.arccos( eo_dot(unit_r_proj, unit_t) )

        # angle between r_proj and 1
        a_r1_proj = np.arccos( eo_dot(unit_r_proj, unit_1) )

        # print(
        #     np.cos(a_rt_proj) / np.cos(a_r1_proj) * norm_t / norm_1 - (_tp / (_tp + _fn))
        # )

        # all three should be the same
        # print(_tp / (_tp + _fn))
        # print(eo_dot(_r, _t) / eo_dot(_r, 1) )
        # print(np.cos(a_rt_proj) / np.cos(a_r1_proj) * norm_t / norm_1 )

        # This vector, dotted with _s_inv, is 1
        _s_inv_bias = _s_inv / norm_s_inv ** 2

        # project s_inv to t-1 plane
        s_inv_proj = (
            basis_t * eo_dot(_s_inv, basis_t) +
            basis_1 * eo_dot(_s_inv, basis_1)
        )
        norm_s_inv_proj = np.sqrt(eo_dot(s_inv_proj, s_inv_proj))
        unit_s_inv_proj = s_inv_proj / norm_s_inv_proj

        # direction of semi-major axis of projected ellipse
        # is rotated 90 deg relative to projection of s_inv
        unit_aa = (
            basis_t * eo_dot(unit_s_inv_proj, basis_1)
            - basis_1 * eo_dot(unit_s_inv_proj, basis_t)
        )

        # direction of semi-minor axis of projected ellipse
        unit_bb = (
            basis_t * eo_dot(unit_s_inv_proj, basis_t) +
            basis_1 * eo_dot(unit_s_inv_proj, basis_1)
        )

        # check is close to zero
        # print(eo_dot(unit_aa, unit_bb))

        # check is close to one
        # print(eo_dot(unit_aa, unit_aa))

        # check is close to one
        # print(eo_dot(unit_bb, unit_bb))

        unit_bb = unit_bb

        def of_bg(bg):
            '''
            Get extremal possible values of TPR as function of budget Bg

            We can extremize difference in ratios of angles in the 1-t plane, because
            the projection to the 1-t plane is all that matters.
            '''

            # semi major axis
            aa = unit_aa * bg

            # semi minor axis
            bb = unit_bb * eo_dot(unit_s_inv_proj, unit_s_inv) * bg

            def to_minimize(th):

                # point on ellipse as function of angle th in t-1 plane
                p = aa * np.cos(th) + bb * np.sin(th) + r_proj

                norm_p = np.sqrt(eo_dot(p, p))

                # maximize sum of angles away from center of ellipse as seen from origin for each group
                return np.sum(-np.arccos(eo_dot(p / norm_p, unit_r_proj)))

            # find angles domains over which to maximize separately
            # outputs from -pi to pi
            split_th = np.arctan2(eo_dot(unit_bb, unit_r_proj), eo_dot(unit_aa, unit_r_proj))

            bounds = np.vstack((split_th, split_th + np.pi))
            x0 = bounds.sum(axis=0) / 2

            sol1 = opt.minimize(
                to_minimize, # objective function
                x0=x0,
                bounds=np.transpose(bounds),
                method='Nelder-Mead'
            ).x

            bounds = np.vstack((split_th - np.pi, split_th))
            x0 = bounds.sum(axis=0) / 2

            sol2 = opt.minimize(
                to_minimize, # objective function
                x0=x0,
                bounds=np.transpose(bounds),
                method='Nelder-Mead'
            ).x

            p1 = aa * np.cos(sol1) + bb * np.sin(sol1) + r_proj
            p2 = aa * np.cos(sol2) + bb * np.sin(sol2) + r_proj

            # from origin
            unit_p1 = p1 / np.sqrt(eo_dot(p1, p1))
            unit_p2 = p2 / np.sqrt(eo_dot(p2, p2))

            # Minimum possible TPR, maximum possible TPR
            # recall all angles are bounded between 0 and pi/2

            cos_p1_t = eo_dot(unit_p1, unit_t)
            cos_p1_1 = eo_dot(unit_p1, unit_1)

            cos_p2_t = eo_dot(unit_p2, unit_t)
            cos_p2_1 = eo_dot(unit_p2, unit_1)

            b1 = cos_p1_t / cos_p1_1 * norm_t / norm_1
            b2 = cos_p2_t / cos_p2_1 * norm_t / norm_1

            extrema = (
                np.minimum(
                    np.maximum(
                        np.minimum(
                            b1, b2
                        ),
                        0
                    ),
                    1
                ),
                np.maximum(
                    np.minimum(
                        np.maximum(
                            b2, b2
                        ),
                        1
                    ),
                    0
                )
            )

            for gi, g in enumerate(groups):

                if cos_p1_t[gi] < 0:
                    extrema[0][gi] = 0
                    extrema[1][gi] = 1

                if cos_p1_1[gi] < 0:
                    extrema[0][gi] = 0
                    extrema[1][gi] = 1

                if cos_p2_t[gi] < 0:
                    extrema[0][gi] = 0
                    extrema[1][gi] = 1

                if cos_p2_1[gi] < 0:
                    extrema[0][gi] = 0
                    extrema[1][gi] = 1

            bound = 0

            # strategic response covariate shift implies TPR strictly
            # increases if Pr(Y=1 | X) is monotonic in X, but, in general
            # we will use the adversarial bound, which requires
            # computation of all possible combinations
            n = len(groups)
            for i in range(n):
                tpr = np.array([extrema[int(x)][j] for j, x in enumerate(bin(i)[2:].zfill(n))])
                bound = max(bound, eo_violation(tpr))

            return bound

        return of_bg

    # Verifying that extremal angles extremize TPR
    #
    # fig = plt.figure()
    # ax = fig.add_subplot(projection='3d')

    # for angle_sum in tqdm(np.linspace(0, np.pi/2, 30)):
    #     ratios=[]
    #     thetas=[]
    #     for theta in np.linspace(angle_sum - np.pi/2 + 0.1, np.pi/2, 30):
    #         ratios.append(np.cos(theta) / np.cos(angle_sum - theta))
    #         thetas.append(theta)
    #     ax.set_xlabel('angle_sum')
    #     ax.set_ylabel('numerator angle')
    #     ax.set_zlabel('cos ratio')
    #     ax.scatter([angle_sum], thetas, ratios)
    # plt.show()

    m = 10

    phi_space = np.array(np.linspace(min(idx), max(idx), m))
    print(phi_space)

    # maximum shift between groups
    if not os.path.exists(f'{state_1}_{state_2}_upper_bound'):

        shifted_viol = []
        upper_bound = []
        phi_g = []
        phi_h = []

        bg = div_eo(_x_g, _x_g_R) # measure of covariate shift

        # possible tpr values
        for _phi_g in tqdm(phi_space): # what the graphic represents as tau, we internally represent as phi

            _shifted_viol = []
            _upper_bound = []

            for _phi_h in phi_space:

                # compare violation of EO on both distributions for
                # given thresholds
                phi = np.array([_phi_g, _phi_h])

                S_tp = tp_phi(phi, _Xy1_g=_Xy1_g)
                S_fn = fn_phi(phi, _Xy1_g=_Xy1_g)
                S_tpr = S_tp / (S_tp + S_fn)

                bound = bound_eo(phi)(bg)
                _upper_bound.append(eo_violation(S_tpr) + bound)

                R_tp = tp_phi(phi, _Xy1_g=_Xy1_g_R)
                R_fn = fn_phi(phi, _Xy1_g=_Xy1_g_R)
                R_tpr = R_tp / (R_tp + R_fn)

                _shifted_viol.append(eo_violation(R_tpr))

                phi_g.append(_phi_g / 100)
                phi_h.append(_phi_h / 100)

            shifted_viol.append(_shifted_viol)
            upper_bound.append(_upper_bound)

            # ax.plot(max_bgs, tpr * np.ones(k), violation, linestyle='dotted', color='blue')
            # ax.plot(max_bgs, tpr * np.ones(k), bound, linestyle='dotted', color='black')

        shifted_viol = np.array(shifted_viol).flatten()
        upper_bound = np.array(upper_bound).flatten()

        with open(f'{state_1}_{state_2}_phi_g', 'wb') as f:
            pickle.dump(phi_g, f)
        with open(f'{state_1}_{state_2}_phi_h', 'wb') as f:
            pickle.dump(phi_h, f)
        with open(f'{state_1}_{state_2}_shifted_viol', 'wb') as f:
            pickle.dump(shifted_viol, f)
        with open(f'{state_1}_{state_2}_upper_bound', 'wb') as f:
            pickle.dump(upper_bound, f)
    else:
        with open(f'{state_1}_{state_2}_phi_g', 'rb') as f:
            phi_g = pickle.load(f)
        with open(f'{state_1}_{state_2}_phi_h', 'rb') as f:
            phi_h = pickle.load(f)
        with open(f'{state_1}_{state_2}_shifted_viol', 'rb') as f:
            shifted_viol = pickle.load(f)
        with open(f'{state_1}_{state_2}_upper_bound', 'rb') as f:
            upper_bound = pickle.load(f)

    ######
    # Plotting

    fig = plt.figure(figsize=(9,9))

    ax = fig.add_subplot(1, 2, 1, projection='3d')
    ax.plot_trisurf(phi_g, phi_h, shifted_viol, alpha=0.7, antialiased=True)
    ax.plot_trisurf(phi_g, phi_h, upper_bound, alpha=0.4, antialiased=True, cmap='viridis')
    ax.view_init(20, 75)
    ax.set_xlabel('$\\tau_g$')
    ax.set_ylabel('$\\tau_h$')
    ax.set_zlabel('Violation of Equal Opportunity')

    # ax = fig.add_subplot(1, 2, 2, projection='3d')
    # ax.plot_trisurf(phi_g, phi_h, shifted_viol, alpha=0.7, antialiased=True)
    # ax.plot_trisurf(phi_g, phi_h, upper_bound, alpha=0.4, antialiased=True, cmap='viridis')
    # ax.view_init(20, 75 - 4)
    # ax.set_xlabel('$\\tau_g$')
    # ax.set_ylabel('$\\tau_h$')
    # ax.set_zlabel('Violation of Equal Opportunity')

    plt.tight_layout()
    plt.savefig(f'{state_1}_{state_2}_EO_bound.pdf', bbox_inches='tight')

main('CA', 'IL')
main('CA', 'NV')
main('NV', 'IL')
