# Supplementary material
Source: ML conference proceedings conference paper supplement (https://proceedings.neurips.cc/paper_files/paper/2022/hash/4937610670be26d651ecdb4f2206d95f-Abstract.html)
Supplement: Supplementary file 1 [file 4937610670be26d651ecdb4f2206d95f-Supplemental-Conference.zip › Fairness_Transferability/cov_states/NV_cdf.csv]

	Score	Group_0	Group_1	Group_2	Group_3
0	0.0	0.0	0.0	0.0	0.0
1	0.5	0.0	0.0	0.0	0.0
2	1.0	0.0	0.0	0.0	0.0
3	1.5	0.0	0.010116337885685382	0.0	0.0
4	2.0	0.08944543828264759	0.09104704097116843	0.0	0.0
5	2.5	0.2683363148479428	0.19221041982802226	0.04911591355599214	0.0
6	3.0	0.6261180679785331	0.3136064744562468	0.09823182711198428	0.0
7	3.5	0.7155635062611807	0.4754678806272129	0.2455795677799607	0.0
8	4.0	1.341681574239714	0.7384926656550328	0.44204322200392926	0.0
9	4.5	1.6100178890876566	0.9914011127971674	0.6385068762278978	0.3144654088050315
10	5.0	2.23613595706619	1.294891249367729	0.9823182711198428	0.3144654088050315
11	5.5	2.5044722719141324	1.669195751138088	1.2770137524557956	0.628930817610063
12	6.0	3.2200357781753133	2.104198280222559	1.424361493123772	1.257861635220126
13	6.5	3.6672629695885512	2.5392008093070304	1.7190569744597248	1.886792452830189
14	7.0	3.9355992844364938	3.0349013657056143	2.2593320235756384	2.2012578616352205
15	7.5	4.203935599284437	3.5508345978755687	2.7504911591355596	2.515723270440252
16	8.0	5.008944543828264	4.0364188163884664	2.9960707269155207	2.8301886792452833
17	8.5	5.635062611806798	4.6130500758725335	3.4381139489194497	3.7735849056603774
18	9.0	5.813953488372093	5.149215983813858	4.027504911591355	4.40251572327044
19	9.5	6.440071556350626	5.756196256954981	4.518664047151277	5.345911949685534
20	10.0	7.155635062611807	6.39352554375316	5.1080550098231825	5.660377358490566
21	10.5	7.692307692307692	7.091552857865452	5.697445972495087	7.861635220125786
22	11.0	8.676207513416815	7.789580171977743	6.286836935166994	9.119496855345911
23	11.5	9.212880143112699	8.447142134547294	6.876227897838899	10.062893081761006
24	12.0	9.481216457960642	9.064238745574102	7.760314341846758	10.691823899371068
25	12.5	10.28622540250447	9.843196762771877	8.447937131630647	11.949685534591193
26	13.0	10.912343470483004	10.662620131512393	8.988212180746562	12.578616352201259
27	13.5	11.270125223613594	11.360647445624682	9.872298624754421	14.465408805031446
28	14.0	11.985688729874774	12.129489124936772	10.658153241650295	15.40880503144654
29	14.5	13.059033989266544	12.98937784522003	11.149312377210215	16.037735849056602
30	15.0	14.042933810375668	13.990895295902883	11.738703339882122	17.29559748427673
31	15.5	14.579606440071554	14.891249367728882	12.229862475442042	18.867924528301884
32	16.0	15.83184257602862	15.781487101669194	13.015717092337917	21.383647798742135
33	16.5	16.5474060822898	16.78300455235205	13.752455795677799	22.32704402515723
34	17.0	18.246869409660103	17.491148204350026	14.440078585461688	22.641509433962263
35	17.5	19.588550983899818	18.442083965604454	15.471512770137524	24.528301886792452
36	18.0	20.393559928443647	19.312089023773396	16.453831041257367	25.471698113207548
37	18.5	21.198568872987476	20.273141122913508	17.337917485265226	27.044025157232703
38	19.0	22.271914132379244	21.173495194739505	17.927308447937133	27.9874213836478
39	19.5	23.25581395348837	22.06373292867982	18.811394891944992	29.245283018867923
40	20.0	24.150268336314845	23.014668689934243	19.793713163064833	29.874213836477985
41	20.5	24.955277280858674	24.097116843702583	21.021611001964637	30.18867924528302
42	21.0	26.833631484794275	25.08851795649975	21.80746561886051	32.075471698113205
43	21.5	27.638640429338103	26.1608497723824	22.74066797642436	33.64779874213836
44	22.0	28.622540250447226	27.202832574607992	23.968565815324162	35.53459119496855
45	22.5	29.60644007155635	28.244815376833586	24.999999999999996	36.16352201257861
46	23.0	30.32200357781753	29.2058674759737	25.589390962671903	37.73584905660377
47	23.5	31.12701252236136	30.1770359129995	26.37524557956778	38.36477987421383
48	24.0	32.021466905187836	31.087506322711185	27.357563850687622	39.93710691823899
49	24.5	33.005366726296955	32.05867475973698	27.946954813359525	41.19496855345911
50	25.0	33.36314847942755	33.05007587253415	28.7328094302554	41.82389937106918
51	25.5	34.078711985688734	34.01112797167426	29.862475442043223	43.39622641509433
52	26.0	35.50983899821109	35.11380880121398	30.550098231827118	44.65408805031446
53	26.5	37.0304114490161	36.16590794132525	31.385068762278983	44.96855345911949
54	27.0	38.01431127012522	37.18765806777948	32.46561886051081	46.226415094339615
55	27.5	39.44543828264758	38.04754678806274	33.7426326129666	47.16981132075471
56	28.0	40.87656529516994	39.00859888720285	34.3811394891945	47.79874213836477
57	28.5	42.3076923076923	39.787556904400624	35.019646365422396	48.11320754716981
58	29.0	43.470483005366724	40.778958017197795	36.29666011787819	48.74213836477987
59	29.5	44.45438282647585	41.80070814365202	36.8369351669941	48.74213836477987
60	30.0	45.70661896243291	42.65048052604959	37.475442043222	49.37106918238993
61	30.5	46.332737030411444	43.57106727364696	38.35952848722986	49.99999999999999
62	31.0	47.227191413237925	44.30955993930199	38.99803536345775	49.99999999999999
63	31.5	48.1216457960644	45.42235710672738	39.83300589390962	50.62893081761006
64	32.0	48.837209302325576	46.231664137582214	40.66797642436149	51.57232704402516
65	32.5	49.910554561717355	47.223065250379385	41.55206286836935	52.51572327044025
66	33.0	50.89445438282647	47.840161861406195	42.779960707269154	53.459119496855344
67	33.5	51.699463327370296	48.639352554375336	43.56581532416503	54.088050314465406
68	34.0	52.77280858676207	49.64087000505819	44.49901768172888	54.71698113207547
69	34.5	53.48837209302325	50.54122407688419	45.186640471512774	55.34591194968554
70	35.0	54.47227191413238	51.4415781487102	46.218074656188605	55.9748427672956
71	35.5	55.99284436493739	52.15983813859386	47.053045186640475	57.23270440251572
72	36.0	57.066189624329155	52.79716742539205	47.789783889980356	58.80503144654088
73	36.5	57.692307692307686	53.53566009104708	48.821218074656194	59.43396226415094
74	37.0	58.67620751341681	54.22357106727368	49.36149312377211	60.691823899371066
75	37.5	59.2128801431127	54.82043500252912	50.392927308447945	61.94968553459119
76	38.0	59.92844364937389	55.44764795144162	51.47347740667977	62.893081761006286
77	38.5	60.196779964221825	55.983813859382934	52.455795677799614	64.15094339622641
78	39.0	61.18067978533095	56.60091047040975	52.89783889980354	65.09433962264151
79	39.5	61.98568872987478	57.2584724329793	53.24165029469549	65.72327044025157
80	40.0	62.88014311270125	57.996965098634334	53.831041257367396	67.61006289308176
81	40.5	64.13237924865831	58.654527061203886	54.51866404715129	67.61006289308176
82	41.0	65.02683363148478	59.44360141628735	55.20628683693518	68.23899371069182
83	41.5	65.65295169946332	60.18209408194238	55.99214145383106	68.86792452830188
84	42.0	66.01073345259391	60.819423368740566	56.876227897838916	69.81132075471697
85	42.5	66.63685152057243	61.44663631765306	57.85854616895876	70.12578616352201
86	43.0	67.7101967799642	62.07384926656555	58.202357563850704	71.38364779874213
87	43.5	68.78354203935598	62.59989883662119	58.8899803536346	71.69811320754717
88	44.0	69.4096601073345	63.095599393019775	59.675834970530474	72.32704402515722
89	44.5	70.21466905187833	63.682346990389526	60.60903732809433	73.58490566037736
90	45.0	71.2880143112701	64.32979261507339	61.44400785854619	73.89937106918238
91	45.5	72.00357781753128	64.89630753667177	61.984282907662106	74.52830188679245
92	46.0	73.07692307692305	65.37177541729898	62.67190569744599	74.84276729559748
93	46.5	74.06082289803217	65.95852301466874	63.45776031434187	74.84276729559748
94	47.0	74.95527728085864	66.5452706120385	63.850687622789806	75.78616352201257
95	47.5	75.67084078711983	67.06120384420844	64.93123772102163	76.41509433962264
96	48.0	76.20751341681571	67.64795144157819	65.42239685658156	76.72955974842766
97	48.5	76.74418604651162	68.14365199797678	66.11001964636544	77.35849056603773
98	49.0	77.19141323792485	68.77086494688926	66.60117878192537	77.35849056603773
99	49.5	77.90697674418603	69.39807789580176	67.0923379174853	77.35849056603773
100	50.0	78.26475849731662	69.87354577642897	68.17288801571712	78.30188679245282
101	50.5	79.15921288014309	70.48052604957009	68.66404715127705	78.61635220125785
102	51.0	79.51699463327368	71.08750632271122	69.007858546169	78.61635220125785
103	51.5	79.69588550983899	71.54274152756706	69.89194499017685	79.55974842767294
104	52.0	80.32200357781751	72.12948912493681	70.13752455795682	79.55974842767294
105	52.5	81.12701252236134	72.61507334344971	70.9233791748527	80.50314465408805
106	53.0	81.30590339892663	73.09054122407692	71.4636542239686	80.81761006289308
107	53.5	81.93202146690517	73.57612544258983	72.24950884086448	82.0754716981132
108	54.0	82.3792486583184	73.99089529590293	72.59332023575644	82.38993710691823
109	54.5	82.737030411449	74.44613050075877	73.3300589390963	82.38993710691823
110	55.0	83.0948121645796	74.93171471927167	74.16502946954817	82.70440251572326
111	55.5	83.81037567084077	75.49822964087005	75.00000000000003	83.0188679245283
112	56.0	84.16815742397137	75.98381385938295	75.68762278978393	84.27672955974842
113	56.5	84.43649373881931	76.44916540212449	76.22789783889984	84.27672955974842
114	57.0	84.7942754919499	76.96509863429443	76.71905697445976	84.90566037735849
115	57.5	85.1520572450805	77.45068285280735	77.1119842829077	84.90566037735849
116	58.0	85.50983899821108	78.15882650480532	77.50491159135564	85.22012578616352
117	58.5	85.77817531305902	78.715225088518	78.33988212180749	85.53459119496854
118	59.0	86.49373881932021	79.28174001011638	79.22396856581535	85.84905660377358
119	59.5	87.0304114490161	79.9595346484573	79.76424361493126	86.16352201257861
120	60.0	87.3881932021467	80.34395548811335	80.55009823182714	86.16352201257861
121	60.5	87.56708407871199	80.85988872028331	80.99214145383107	86.47798742138365
122	61.0	87.56708407871199	81.5477996965099	81.48330058939099	86.79245283018867
123	61.5	88.19320214669052	81.94233687405163	82.31827111984286	87.1069182389937
124	62.0	88.99821109123435	82.42792109256453	83.00589390962675	87.73584905660377
125	62.5	89.17710196779964	82.7415275670208	83.49705304518668	88.36477987421382
126	63.0	90.51878354203936	83.17653009610527	84.0373280943026	88.67924528301886
127	63.5	90.69767441860466	83.62164896307543	84.5776031434185	88.99371069182389
128	64.0	91.23434704830055	84.10723318158833	84.92141453831044	89.30817610062893
129	64.5	91.50268336314849	84.45118866970162	85.26522593320239	89.30817610062893
130	65.0	91.77101967799642	84.74456246838649	85.8055009823183	89.62264150943395
131	65.5	92.03935599284436	85.12898330804254	86.24754420432224	89.93710691823898
132	66.0	92.57602862254025	85.46282245827015	86.39489194499022	91.1949685534591
133	66.5	92.66547406082289	85.90794132524032	86.88605108055015	91.50943396226414
134	67.0	92.66547406082289	86.27212948912499	87.03339882121813	91.50943396226414
135	67.5	92.75491949910554	86.60596863935261	87.67190569744602	92.76729559748426
136	68.0	93.11270125223614	87.06120384420845	87.819253438114	92.76729559748426
137	68.5	93.47048300536672	87.43550834597882	88.11394891944995	92.76729559748426
138	69.0	93.64937388193202	87.88062721294898	88.4577603143419	92.76729559748426
139	69.5	94.09660107334525	88.22458270106227	88.80157170923384	93.0817610062893
140	70.0	94.3649373881932	88.53818917551854	89.39096267190575	93.0817610062893
141	70.5	94.54382826475849	88.9124936772889	89.78388998035368	93.39622641509433
142	71.0	94.54382826475849	89.27668184117357	90.3241650294696	93.39622641509433
143	71.5	94.72271914132378	89.63075366717256	90.61886051080555	93.39622641509433
144	72.0	94.99105545617172	89.92412746585742	90.81532416502951	93.71069182389937
145	72.5	95.52772808586761	90.48052604957012	91.11001964636546	94.02515723270439
146	73.0	95.8855098389982	90.9054122407689	91.55206286836939	95.28301886792451
147	73.5	96.06440071556351	91.1178553363683	91.94499017681733	95.28301886792451
148	74.0	96.51162790697674	91.58320687910982	92.0923379174853	95.28301886792451
149	74.5	96.60107334525938	91.89681335356607	92.43614931237725	95.28301886792451
150	75.0	96.95885509838998	92.39251390996466	92.63261296660122	95.59748427672955
151	75.5	97.04830053667261	92.65553869499247	93.07465618860515	95.91194968553458
152	76.0	97.22719141323792	93.03995953464852	93.27111984282911	96.22641509433961
153	76.5	97.40608228980321	93.39403136064752	93.56581532416506	96.54088050314465
154	77.0	97.67441860465115	93.84926656550336	93.958742632613	96.54088050314465
155	77.5	97.76386404293379	94.14264036418822	94.25343811394895	96.54088050314465
156	78.0	97.94275491949908	94.46636317653015	94.64636542239687	96.85534591194967
157	78.5	98.03220035778173	94.81031866464346	94.94106090373282	96.85534591194967
158	79.0	98.03220035778173	95.04299443601421	95.23575638506877	96.85534591194967
159	79.5	98.30053667262966	95.34648457258477	95.53045186640472	96.85534591194967
160	80.0	98.30053667262966	95.72078907435514	95.87426326129666	96.85534591194967
161	80.5	98.38998211091231	96.20637329286804	95.92337917485267	96.85534591194967
162	81.0	98.47942754919495	96.46939807789586	96.16895874263263	97.48427672955974
163	81.5	98.56887298747759	96.80323722812348	96.46365422396858	97.79874213836477
164	82.0	98.56887298747759	97.10672736469405	96.85658153241651	98.42767295597483
165	82.5	98.7477638640429	97.4203338391503	97.05304518664047	98.42767295597483
166	83.0	98.92665474060819	97.65300961052105	97.44597249508841	98.42767295597483
167	83.5	99.01610017889084	97.94638340920592	97.54420432220039	98.74213836477986
168	84.0	99.10554561717348	98.18917551846238	97.83889980353634	98.74213836477986
169	84.5	99.19499105545611	98.52301466869	97.93713163064832	98.74213836477986
170	85.0	99.19499105545611	98.69499241274666	98.03536345776031	98.74213836477986
171	85.5	99.28443649373875	98.91755184623173	98.28094302554027	98.74213836477986
172	86.0	99.3738819320214	99.05918057663132	98.52652259332024	98.74213836477986
173	86.5	99.64221824686933	99.27162367223072	98.7229862475442	99.0566037735849
174	87.0	99.64221824686933	99.40313606474463	98.82121807465619	99.68553459119495
175	87.5	99.82110912343464	99.51441578148716	99.01768172888015	99.99999999999999
176	88.0	99.82110912343464	99.59534648457264	99.21414538310411	99.99999999999999
177	88.5	99.91055456171728	99.63581183611538	99.21414538310411	99.99999999999999
178	89.0	99.91055456171728	99.6965098634295	99.3123772102161	99.99999999999999
179	89.5	99.91055456171728	99.7572078907436	99.41060903732807	99.99999999999999
180	90.0	99.91055456171728	99.80778958017204	99.60707269155205	99.99999999999999
181	90.5	99.99999999999993	99.8381385938291	99.901768172888	99.99999999999999
182	91.0	99.99999999999993	99.88872028325753	99.95088408644399	99.99999999999999
183	91.5	99.99999999999993	99.92918563480026	99.95088408644399	99.99999999999999
184	92.0	99.99999999999993	99.95953464845732	99.95088408644399	99.99999999999999
185	92.5	99.99999999999993	99.95953464845732	99.95088408644399	99.99999999999999
186	93.0	99.99999999999993	99.95953464845732	99.99999999999999	99.99999999999999
187	93.5	99.99999999999993	99.96965098634301	99.99999999999999	99.99999999999999
188	94.0	99.99999999999993	99.98988366211438	99.99999999999999	99.99999999999999
189	94.5	99.99999999999993	99.98988366211438	99.99999999999999	99.99999999999999
190	95.0	99.99999999999993	99.98988366211438	99.99999999999999	99.99999999999999
191	95.5	99.99999999999993	100.00000000000007	99.99999999999999	99.99999999999999
192	96.0	99.99999999999993	100.00000000000007	99.99999999999999	99.99999999999999
193	96.5	99.99999999999993	100.00000000000007	99.99999999999999	99.99999999999999
194	97.0	99.99999999999993	100.00000000000007	99.99999999999999	99.99999999999999
195	97.5	99.99999999999993	100.00000000000007	99.99999999999999	99.99999999999999
196	98.0	99.99999999999993	100.00000000000007	99.99999999999999	99.99999999999999
197	98.5	99.99999999999993	100.00000000000007	99.99999999999999	99.99999999999999
198	99.0	99.99999999999993	100.00000000000007	99.99999999999999	99.99999999999999
199	99.5	99.99999999999993	100.00000000000007	99.99999999999999	99.99999999999999
200	100.0	99.99999999999993	100.00000000000007	99.99999999999999	99.99999999999999
