# Supplementary material
Source: ML conference proceedings conference paper supplement (https://proceedings.neurips.cc/paper_files/paper/2022/hash/4937610670be26d651ecdb4f2206d95f-Abstract.html)
Supplement: Supplementary file 1 [file 4937610670be26d651ecdb4f2206d95f-Supplemental-Conference.zip › Fairness_Transferability/cov_states/NV_default.csv]

	Score	Group_0	Group_1	Group_2	Group_3
0	0.0	100.0	100.0	100.0	100.0
1	0.5	100.0	100.0	100.0	100.0
2	1.0	100.0	100.0	100.0	100.0
3	1.5	100.0	100.0	100.0	100.0
4	2.0	100.0	100.0	100.0	100.0
5	2.5	100.0	100.0	100.0	100.0
6	3.0	75.0	91.66666666666666	100.0	100.0
7	3.5	100.0	100.0	100.0	100.0
8	4.0	100.0	92.3076923076923	100.0	100.0
9	4.5	66.66666666666666	96.0	100.0	100.0
10	5.0	85.71428571428571	96.66666666666667	100.0	100.0
11	5.5	100.0	97.2972972972973	83.33333333333334	100.0
12	6.0	100.0	95.34883720930233	100.0	100.0
13	6.5	80.0	90.69767441860465	100.0	100.0
14	7.0	100.0	91.83673469387756	100.0	100.0
15	7.5	100.0	98.0392156862745	90.0	100.0
16	8.0	100.0	95.83333333333334	100.0	100.0
17	8.5	100.0	94.73684210526315	77.77777777777779	100.0
18	9.0	100.0	96.22641509433963	100.0	100.0
19	9.5	85.71428571428571	88.33333333333333	90.0	100.0
20	10.0	87.5	93.65079365079364	91.66666666666666	100.0
21	10.5	100.0	94.20289855072464	100.0	100.0
22	11.0	100.0	95.65217391304348	100.0	100.0
23	11.5	100.0	90.76923076923077	100.0	100.0
24	12.0	100.0	91.80327868852459	83.33333333333334	50.0
25	12.5	100.0	92.20779220779221	92.85714285714286	75.0
26	13.0	100.0	92.5925925925926	100.0	50.0
27	13.5	100.0	89.85507246376811	100.0	100.0
28	14.0	87.5	86.8421052631579	93.75	66.66666666666666
29	14.5	91.66666666666666	87.05882352941177	100.0	100.0
30	15.0	100.0	94.94949494949495	75.0	100.0
31	15.5	83.33333333333334	80.89887640449437	90.0	80.0
32	16.0	100.0	87.5	93.75	50.0
33	16.5	100.0	86.86868686868688	93.33333333333333	100.0
34	17.0	100.0	87.14285714285714	85.71428571428571	100.0
35	17.5	86.66666666666667	88.29787234042553	76.19047619047619	83.33333333333334
36	18.0	88.88888888888889	88.37209302325581	95.0	100.0
37	18.5	100.0	88.42105263157895	88.88888888888889	100.0
38	19.0	100.0	89.8876404494382	91.66666666666666	100.0
39	19.5	100.0	84.0909090909091	94.44444444444444	100.0
40	20.0	100.0	90.42553191489363	95.0	100.0
41	20.5	100.0	81.30841121495327	100.0	100.0
42	21.0	95.23809523809523	84.6938775510204	100.0	83.33333333333334
43	21.5	66.66666666666666	79.24528301886792	94.73684210526315	100.0
44	22.0	100.0	84.46601941747572	96.0	100.0
45	22.5	100.0	86.40776699029125	85.71428571428571	100.0
46	23.0	100.0	80.0	100.0	60.0
47	23.5	88.88888888888889	86.45833333333334	100.0	100.0
48	24.0	100.0	87.77777777777777	85.0	80.0
49	24.5	90.9090909090909	76.04166666666666	100.0	75.0
50	25.0	75.0	80.61224489795919	100.0	100.0
51	25.5	87.5	76.84210526315789	86.95652173913044	100.0
52	26.0	100.0	80.73394495412845	85.71428571428571	75.0
53	26.5	88.23529411764706	84.61538461538461	94.11764705882352	100.0
54	27.0	100.0	78.21782178217822	72.72727272727273	75.0
55	27.5	100.0	77.64705882352942	96.15384615384616	33.33333333333333
56	28.0	100.0	84.21052631578947	92.3076923076923	100.0
57	28.5	100.0	74.02597402597402	69.23076923076923	100.0
58	29.0	100.0	64.28571428571429	80.76923076923077	100.0
59	29.5	100.0	75.24752475247524	90.9090909090909	100.0
60	30.0	100.0	78.57142857142857	84.61538461538461	100.0
61	30.5	100.0	80.21978021978022	88.88888888888889	100.0
62	31.0	100.0	78.08219178082192	92.3076923076923	100.0
63	31.5	90.0	83.63636363636363	76.47058823529412	0.0
64	32.0	87.5	70.0	88.23529411764706	100.0
65	32.5	91.66666666666666	82.6530612244898	94.44444444444444	100.0
66	33.0	100.0	70.49180327868852	88.0	100.0
67	33.5	77.77777777777779	78.48101265822784	93.75	100.0
68	34.0	91.66666666666666	74.74747474747475	94.73684210526315	100.0
69	34.5	100.0	68.53932584269663	92.85714285714286	100.0
70	35.0	100.0	78.65168539325843	85.71428571428571	100.0
71	35.5	82.35294117647058	76.05633802816901	88.23529411764706	75.0
72	36.0	83.33333333333334	58.730158730158735	60.0	100.0
73	36.5	85.71428571428571	79.45205479452055	85.71428571428571	100.0
74	37.0	90.9090909090909	72.05882352941177	90.9090909090909	100.0
75	37.5	100.0	66.10169491525424	95.23809523809523	75.0
76	38.0	100.0	72.58064516129032	68.18181818181817	100.0
77	38.5	100.0	84.90566037735849	95.0	50.0
78	39.0	90.9090909090909	73.77049180327869	100.0	66.66666666666666
79	39.5	88.88888888888889	58.46153846153847	85.71428571428571	100.0
80	40.0	100.0	69.86301369863014	83.33333333333334	100.0
81	40.5	92.85714285714286	66.15384615384615	85.71428571428571	100.0
82	41.0	90.0	75.64102564102564	92.85714285714286	100.0
83	41.5	100.0	67.12328767123287	81.25	100.0
84	42.0	100.0	65.07936507936508	94.44444444444444	66.66666666666666
85	42.5	85.71428571428571	59.67741935483871	85.0	100.0
86	43.0	100.0	74.19354838709677	71.42857142857143	100.0
87	43.5	91.66666666666666	65.38461538461539	57.14285714285714	100.0
88	44.0	100.0	67.3469387755102	81.25	50.0
89	44.5	100.0	72.41379310344827	84.21052631578947	100.0
90	45.0	100.0	60.9375	94.11764705882352	100.0
91	45.5	87.5	69.64285714285714	72.72727272727273	50.0
92	46.0	91.66666666666666	61.702127659574465	92.85714285714286	0.0
93	46.5	90.9090909090909	58.620689655172406	81.25	100.0
94	47.0	80.0	75.86206896551724	50.0	66.66666666666666
95	47.5	100.0	64.70588235294117	86.36363636363636	100.0
96	48.0	83.33333333333334	56.896551724137936	80.0	100.0
97	48.5	50.0	71.42857142857143	78.57142857142857	100.0
98	49.0	80.0	56.451612903225815	90.0	100.0
99	49.5	87.5	58.06451612903226	70.0	100.0
100	50.0	75.0	55.319148936170215	81.81818181818183	100.0
101	50.5	90.0	53.333333333333336	90.0	100.0
102	51.0	100.0	51.66666666666667	71.42857142857143	0.0
103	51.5	100.0	62.22222222222222	77.77777777777779	66.66666666666666
104	52.0	85.71428571428571	50.0	60.0	0.0
105	52.5	100.0	58.333333333333336	75.0	33.33333333333333
106	53.0	100.0	61.702127659574465	81.81818181818183	100.0
107	53.5	85.71428571428571	60.416666666666664	68.75	25.0
108	54.0	60.0	48.78048780487805	85.71428571428571	100.0
109	54.5	50.0	64.44444444444444	66.66666666666666	0.0
110	55.0	100.0	60.416666666666664	58.82352941176471	100.0
111	55.5	87.5	53.57142857142857	64.70588235294117	100.0
112	56.0	25.0	60.416666666666664	50.0	50.0
113	56.5	100.0	45.65217391304348	54.54545454545454	0.0
114	57.0	100.0	45.09803921568628	40.0	100.0
115	57.5	100.0	52.083333333333336	75.0	0.0
116	58.0	100.0	42.857142857142854	87.5	100.0
117	58.5	66.66666666666666	54.54545454545454	52.94117647058824	0.0
118	59.0	87.5	51.78571428571429	44.44444444444444	100.0
119	59.5	83.33333333333334	50.74626865671642	72.72727272727273	100.0
120	60.0	100.0	44.73684210526316	56.25	0.0
121	60.5	100.0	56.86274509803921	77.77777777777779	100.0
122	61.0	0.0	48.529411764705884	10.0	100.0
123	61.5	85.71428571428571	58.97435897435898	70.58823529411765	100.0
124	62.0	88.88888888888889	37.5	64.28571428571429	0.0
125	62.5	100.0	48.38709677419355	60.0	50.0
126	63.0	93.33333333333333	41.86046511627907	54.54545454545454	0.0
127	63.5	100.0	50.0	81.81818181818183	100.0
128	64.0	50.0	31.25	71.42857142857143	0.0
129	64.5	100.0	29.411764705882355	42.857142857142854	0.0
130	65.0	100.0	44.827586206896555	90.9090909090909	100.0
131	65.5	33.33333333333333	42.10526315789473	33.33333333333333	0.0
132	66.0	83.33333333333334	39.39393939393939	66.66666666666666	25.0
133	66.5	100.0	25.0	80.0	0.0
134	67.0	0.0	30.555555555555557	66.66666666666666	0.0
135	67.5	100.0	33.33333333333333	76.92307692307693	100.0
136	68.0	75.0	48.888888888888886	66.66666666666666	0.0
137	68.5	75.0	43.24324324324324	66.66666666666666	0.0
138	69.0	50.0	38.63636363636363	42.857142857142854	0.0
139	69.5	80.0	35.294117647058826	71.42857142857143	100.0
140	70.0	33.33333333333333	22.58064516129032	58.333333333333336	0.0
141	70.5	0.0	48.64864864864865	62.5	0.0
142	71.0	0.0	33.33333333333333	27.27272727272727	0.0
143	71.5	50.0	34.285714285714285	66.66666666666666	0.0
144	72.0	33.33333333333333	27.586206896551722	50.0	0.0
145	72.5	50.0	20.0	83.33333333333334	0.0
146	73.0	75.0	35.714285714285715	44.44444444444444	50.0
147	73.5	100.0	42.857142857142854	37.5	0.0
148	74.0	80.0	36.95652173913043	33.33333333333333	0.0
149	74.5	100.0	35.483870967741936	42.857142857142854	0.0
150	75.0	75.0	24.489795918367346	25.0	0.0
151	75.5	100.0	34.61538461538461	55.55555555555556	100.0
152	76.0	100.0	34.21052631578947	0.0	0.0
153	76.5	50.0	22.857142857142858	33.33333333333333	0.0
154	77.0	66.66666666666666	28.888888888888886	100.0	0.0
155	77.5	100.0	24.137931034482758	16.666666666666664	0.0
156	78.0	100.0	40.625	37.5	100.0
157	78.5	0.0	29.411764705882355	66.66666666666666	0.0
158	79.0	0.0	34.78260869565217	33.33333333333333	0.0
159	79.5	33.33333333333333	26.666666666666668	66.66666666666666	0.0
160	80.0	0.0	16.216216216216218	57.14285714285714	0.0
161	80.5	100.0	14.583333333333334	100.0	0.0
162	81.0	100.0	30.76923076923077	60.0	50.0
163	81.5	0.0	21.21212121212121	33.33333333333333	100.0
164	82.0	0.0	16.666666666666664	0.0	50.0
165	82.5	50.0	38.70967741935484	25.0	0.0
166	83.0	50.0	4.3478260869565215	50.0	0.0
167	83.5	100.0	24.137931034482758	50.0	0.0
168	84.0	0.0	8.333333333333332	16.666666666666664	0.0
169	84.5	0.0	21.21212121212121	0.0	0.0
170	85.0	0.0	17.647058823529413	0.0	0.0
171	85.5	0.0	22.727272727272727	20.0	0.0
172	86.0	100.0	7.142857142857142	20.0	0.0
173	86.5	33.33333333333333	9.523809523809524	0.0	0.0
174	87.0	0.0	7.6923076923076925	0.0	0.0
175	87.5	0.0	0.0	25.0	0.0
176	88.0	0.0	0.0	0.0	0.0
177	88.5	100.0	25.0	0.0	0.0
178	89.0	0.0	0.0	50.0	0.0
179	89.5	0.0	0.0	0.0	0.0
180	90.0	0.0	20.0	0.0	0.0
181	90.5	0.0	33.33333333333333	33.33333333333333	0.0
182	91.0	0.0	0.0	0.0	0.0
183	91.5	0.0	0.0	0.0	0.0
184	92.0	0.0	0.0	0.0	0.0
185	92.5	0.0	0.0	0.0	0.0
186	93.0	0.0	0.0	0.0	0.0
187	93.5	0.0	0.0	0.0	0.0
188	94.0	0.0	0.0	0.0	0.0
189	94.5	0.0	0.0	0.0	0.0
190	95.0	0.0	0.0	0.0	0.0
191	95.5	0.0	0.0	0.0	0.0
192	96.0	0.0	0.0	0.0	0.0
193	96.5	0.0	0.0	0.0	0.0
194	97.0	0.0	0.0	0.0	0.0
195	97.5	0.0	0.0	0.0	0.0
196	98.0	0.0	0.0	0.0	0.0
197	98.5	0.0	0.0	0.0	0.0
198	99.0	0.0	0.0	0.0	0.0
199	99.5	0.0	0.0	0.0	0.0
200	100.0	0.0	0.0	0.0	0.0
