# Supplementary material
Source: ML conference proceedings conference paper supplement (https://proceedings.neurips.cc/paper_files/paper/2022/hash/4937610670be26d651ecdb4f2206d95f-Abstract.html)
Supplement: Supplementary file 1 [file 4937610670be26d651ecdb4f2206d95f-Supplemental-Conference.zip › Fairness_Transferability/covariate/cdf_by_race.csv]

Score	Non- Hispanic white	Black	Hispanic	Asian
0	0.01	0.07	0.01	0.00
0.5	0.26	1.19	0.47	0.13
1	1.16	5.33	2.22	0.88
1.5	1.43	6.47	2.74	1.07
2	1.80	7.89	3.49	1.32
2.5	2.09	9.27	4.04	1.51
3	2.55	11.20	5.02	1.83
3.5	2.96	12.82	5.77	2.20
4	3.39	14.58	6.60	2.48
4.5	3.54	15.16	6.92	2.58
5	4.19	17.72	8.22	3.10
5.5	4.72	19.81	9.31	3.49
6	5.28	21.72	10.18	3.90
6.5	5.56	22.93	10.80	4.08
7	6.11	24.69	11.94	4.40
7.5	6.34	25.51	12.38	4.72
8	6.81	26.95	13.18	5.02
8.5	7.02	27.55	13.60	5.14
9	7.34	28.59	14.09	5.38
9.5	7.60	29.38	14.65	5.53
10	7.95	30.45	15.20	5.74
10.5	8.20	31.16	15.69	5.84
11	8.62	32.29	16.38	6.25
11.5	8.94	33.33	16.92	6.46
12	9.56	35.11	18.03	6.95
12.5	9.92	36.07	18.58	7.29
13	10.40	37.20	19.36	7.61
13.5	10.76	38.21	19.95	7.97
14	11.41	39.79	21.10	8.40
14.5	11.75	40.75	21.76	8.68
15	12.29	42.07	22.62	9.09
15.5	12.61	42.91	23.21	9.45
16	13.09	44.04	24.02	9.75
16.5	13.43	44.88	24.69	10.05
17	13.84	45.83	25.49	10.32
17.5	14.13	46.58	25.97	10.53
18	14.56	47.40	26.62	10.96
18.5	14.84	48.07	27.10	11.11
19	15.24	48.76	27.78	11.51
19.5	15.50	49.29	28.21	11.80
20	16.54	53.05	30.31	12.37
20.5	16.88	54.04	30.93	12.68
21	17.37	55.24	31.90	13.02
21.5	17.64	55.90	32.31	13.24
22	18.07	56.76	33.01	13.60
22.5	18.38	57.37	33.55	13.90
23	18.77	58.20	34.24	14.19
23.5	19.13	58.86	35.06	14.41
24	19.73	60.00	36.19	14.95
24.5	20.09	60.62	36.80	15.20
25	20.54	61.45	37.68	15.51
25.5	20.84	62.08	38.17	15.72
26	21.27	62.93	38.95	16.18
26.5	21.67	63.54	39.65	16.62
27	22.27	64.39	40.60	17.10
27.5	22.62	65.00	41.28	17.40
28	23.19	65.85	42.21	17.90
28.5	23.55	66.41	42.93	18.27
29	24.28	67.28	44.01	18.93
29.5	24.71	67.65	44.54	19.16
30	25.24	68.37	45.32	19.73
30.5	25.59	68.85	45.74	20.18
31	26.22	69.59	46.69	21.00
31.5	26.58	69.98	47.24	21.39
32	27.07	70.60	48.05	21.81
32.5	27.48	71.06	48.74	22.37
33	28.00	71.61	49.35	22.92
33.5	28.40	72.14	49.96	23.32
34	28.94	72.67	50.64	23.95
34.5	29.43	73.15	51.28	24.34
35	30.16	73.95	52.20	25.13
35.5	30.42	74.20	52.64	25.48
36	31.17	74.83	53.57	26.16
36.5	31.50	75.11	53.96	26.50
37	32.27	75.87	55.04	27.39
37.5	32.61	76.16	55.38	27.69
38	33.36	76.88	56.39	28.54
38.5	33.66	77.19	56.71	28.81
39	34.32	77.72	57.55	29.66
39.5	34.56	77.95	57.83	29.87
40	35.09	78.32	58.37	30.37
40.5	35.48	78.75	58.79	30.85
41	36.06	79.28	59.47	31.54
41.5	36.33	79.49	59.83	31.86
42	36.97	80.06	60.60	32.52
42.5	37.35	80.43	61.06	32.95
43	37.97	80.95	61.77	33.54
43.5	38.36	81.22	62.19	34.08
44	38.98	81.76	63.03	34.85
44.5	39.54	82.11	63.58	35.46
45	40.03	82.48	64.22	36.03
45.5	40.56	82.85	64.77	36.69
46	41.13	83.23	65.37	37.36
46.5	41.50	83.42	65.71	37.92
47	42.26	83.87	66.47	38.80
47.5	42.59	84.08	66.81	39.33
48	43.37	84.46	67.50	40.14
48.5	43.77	84.66	67.87	40.58
49	44.24	84.94	68.33	41.11
49.5	44.72	85.20	68.78	41.65
50	45.33	85.56	69.38	42.38
50.5	45.63	85.75	69.68	42.78
51	46.19	86.05	70.26	43.63
51.5	46.62	86.24	70.66	44.12
52	47.20	86.46	71.23	44.99
52.5	47.60	86.69	71.73	45.63
53	48.16	86.99	72.28	46.50
53.5	48.66	87.27	72.71	47.31
54	49.29	87.56	73.29	48.22
54.5	49.59	87.70	73.60	48.75
55	50.25	88.06	74.20	49.75
55.5	50.62	88.28	74.57	50.16
56	51.21	88.53	75.14	50.87
56.5	51.58	88.72	75.53	51.46
57	52.19	88.94	76.13	52.31
57.5	52.55	89.05	76.46	52.81
58	53.17	89.25	77.02	53.48
58.5	53.59	89.41	77.40	54.05
59	54.21	89.68	77.88	54.89
59.5	54.65	89.85	78.24	55.45
60	55.32	90.16	78.79	56.40
60.5	55.64	90.28	79.10	56.92
61	56.15	90.49	79.47	57.42
61.5	56.65	90.67	79.82	58.05
62	57.15	90.86	80.23	58.70
62.5	57.69	91.06	80.63	59.66
63	58.23	91.26	80.90	60.28
63.5	58.82	91.48	81.34	61.07
64	59.43	91.65	81.80	61.86
64.5	59.71	91.77	82.04	62.22
65	60.29	91.91	82.47	63.02
65.5	60.66	92.03	82.65	63.48
66	61.26	92.18	83.04	64.13
66.5	61.59	92.28	83.36	64.77
67	61.91	92.36	83.56	65.05
67.5	62.61	92.62	84.07	66.07
68	62.84	92.69	84.25	66.33
68.5	63.15	92.79	84.45	66.70
69	63.86	92.96	84.89	67.50
69.5	64.30	93.06	85.16	68.00
70	64.71	93.19	85.43	68.52
70.5	65.15	93.34	85.70	68.92
71	65.50	93.44	85.94	69.32
71.5	65.82	93.54	86.15	69.68
72	66.57	93.71	86.59	70.58
73	67.42	93.98	87.01	71.73
73.5	67.80	94.06	87.20	72.01
74	68.23	94.20	87.40	72.49
74.5	68.99	94.39	87.83	73.20
75	69.68	94.60	88.21	73.78
75.5	70.15	94.72	88.46	74.32
76	70.58	94.82	88.67	74.73
76.5	71.14	94.98	88.94	75.25
77	72.23	95.26	89.60	76.81
78	73.26	95.47	90.09	77.69
78.5	73.70	95.53	90.26	78.06
79	74.34	95.65	90.53	78.54
79.5	74.78	95.74	90.78	79.03
80	75.34	95.90	91.08	79.58
80.5	75.95	96.11	91.36	80.09
81	77.02	96.30	91.79	81.04
81.5	77.50	96.39	92.02	81.54
82	77.97	96.48	92.21	81.99
82.5	78.49	96.60	92.43	82.54
83	79.02	96.71	92.64	82.99
83.5	79.74	96.85	92.91	83.53
84	80.59	97.00	93.30	84.29
84.5	81.06	97.10	93.52	84.61
85	81.54	97.21	93.69	84.98
85.5	82.51	97.42	94.11	85.71
86	83.07	97.51	94.28	86.08
86.5	83.75	97.64	94.62	86.72
87	84.16	97.73	94.74	87.02
87.5	84.97	97.89	95.03	87.67
88	85.37	97.93	95.19	88.02
88.5	86.18	98.05	95.46	88.67
89	86.62	98.11	95.58	89.10
89.5	87.55	98.24	95.88	89.82
90	88.04	98.31	96.05	90.18
90.5	88.51	98.35	96.24	90.59
91	88.81	98.38	96.32	90.88
91.5	89.28	98.44	96.46	91.27
92	89.98	98.57	96.71	91.76
93	90.97	98.73	97.03	92.56
93.5	91.82	98.85	97.35	93.19
94	92.52	98.97	97.57	93.69
94.5	93.68	99.12	97.93	94.53
95	94.57	99.21	98.21	95.20
95.5	94.92	99.25	98.34	95.46
96	95.85	99.38	98.64	96.28
96.5	96.11	99.42	98.71	96.50
97	96.77	99.51	98.92	97.12
97.5	97.69	99.65	99.24	97.93
98	98.94	99.89	99.66	98.94
98.5	99.62	99.95	99.88	99.61
99	99.91	99.99	99.98	99.89
99.5	99.98	100.00	100.00	99.94
100	100.00	100.00	100.00	100.00
