# Supplementary material
Source: ML conference proceedings conference paper supplement (https://proceedings.neurips.cc/paper_files/paper/2022/hash/4937610670be26d651ecdb4f2206d95f-Abstract.html)
Supplement: Supplementary file 1 [file 4937610670be26d651ecdb4f2206d95f-Supplemental-Conference.zip › Fairness_Transferability/covariate/default_by_race.csv]

Score	Non- Hispanic white	Black	Hispanic	Asian
0	98.54	99.67	99.05	94.77
0.5	97.95	99.23	98.49	94.48
1	97.36	98.80	97.93	94.19
1.5	96.77	98.36	97.38	93.90
2	96.18	97.93	96.82	93.61
2.5	95.58	97.49	96.26	93.32
3	94.99	97.06	95.71	93.03
3.5	94.40	96.62	95.15	92.74
4	93.81	96.18	94.60	92.45
4.5	93.22	95.75	94.04	92.15
5	92.63	95.31	93.48	91.86
5.5	92.04	94.88	92.93	91.57
6	91.45	94.44	92.37	91.28
6.5	90.86	94.01	91.82	90.99
7	90.27	93.57	91.26	90.70
7.5	89.68	93.14	90.70	90.41
8	89.09	92.70	90.15	90.12
8.5	88.50	92.27	89.59	89.83
9	87.91	91.83	89.04	89.54
9.5	87.32	91.39	88.48	89.25
10	86.73	90.96	87.92	88.96
10.5	86.05	90.71	87.42	87.46
11	85.37	90.46	86.92	85.96
11.5	84.69	90.21	86.41	84.46
12	84.01	89.96	85.91	82.96
12.5	83.33	89.70	85.41	81.46
13	82.65	89.45	84.90	79.96
13.5	81.97	89.20	84.40	78.45
14	81.30	88.95	83.89	76.95
14.5	80.62	88.70	83.39	75.45
15	79.94	88.45	82.89	73.95
15.5	79.26	88.20	82.38	72.45
16	78.58	87.95	81.88	70.95
16.5	77.90	87.70	81.38	69.45
17	77.22	87.45	80.87	67.95
17.5	76.54	87.20	80.37	66.45
18	75.86	86.94	79.87	64.95
18.5	75.18	86.69	79.36	63.45
19	74.50	86.44	78.86	61.95
19.5	73.82	86.19	78.35	60.45
20	73.14	85.94	77.85	58.95
20.5	71.27	84.17	75.88	57.78
21	69.41	82.39	73.91	56.60
21.5	67.54	80.62	71.95	55.43
22	65.68	78.84	69.98	54.26
22.5	63.81	77.07	68.01	53.09
23	61.95	75.29	66.04	51.91
23.5	60.08	73.52	64.08	50.74
24	58.22	71.75	62.11	49.57
24.5	56.35	69.97	60.14	48.40
25	54.49	68.20	58.17	47.22
25.5	52.62	66.42	56.20	46.05
26	50.76	64.65	54.24	44.88
26.5	48.89	62.87	52.27	43.71
27	47.03	61.10	50.30	42.53
27.5	45.16	59.33	48.33	41.36
28	43.30	57.55	46.36	40.19
28.5	41.43	55.78	44.40	39.02
29	39.57	54.00	42.43	37.84
29.5	37.70	52.23	40.46	36.67
30	35.84	50.45	38.49	35.50
30.5	34.91	49.37	37.74	34.37
31	33.99	48.29	36.99	33.24
31.5	33.07	47.21	36.24	32.11
32	32.15	46.12	35.49	30.98
32.5	31.23	45.04	34.74	29.85
33	30.31	43.96	33.99	28.72
33.5	29.39	42.88	33.24	27.59
34	28.47	41.80	32.49	26.46
34.5	27.55	40.71	31.74	25.33
35	26.63	39.63	30.99	24.20
35.5	25.71	38.55	30.24	23.08
36	24.79	37.47	29.49	21.95
36.5	23.86	36.38	28.74	20.82
37	22.94	35.30	27.99	19.69
37.5	22.02	34.22	27.24	18.56
38	21.10	33.14	26.49	17.43
38.5	20.18	32.06	25.74	16.30
39	19.26	30.97	24.99	15.17
39.5	18.34	29.89	24.24	14.04
40	17.42	28.81	23.49	12.91
40.5	16.96	28.11	22.99	12.73
41	16.51	27.40	22.48	12.54
41.5	16.05	26.70	21.97	12.36
42	15.59	25.99	21.46	12.17
42.5	15.14	25.29	20.95	11.99
43	14.68	24.59	20.44	11.80
43.5	14.23	23.88	19.93	11.62
44	13.77	23.18	19.42	11.44
44.5	13.31	22.47	18.91	11.25
45	12.86	21.77	18.40	11.07
45.5	12.40	21.07	17.89	10.88
46	11.94	20.36	17.38	10.70
46.5	11.49	19.66	16.87	10.51
47	11.03	18.96	16.36	10.33
47.5	10.58	18.25	15.85	10.15
48	10.12	17.55	15.34	9.96
48.5	9.66	16.84	14.84	9.78
49	9.21	16.14	14.33	9.59
49.5	8.75	15.44	13.82	9.41
50	8.30	14.73	13.31	9.22
50.5	8.11	14.60	13.09	8.94
51	7.93	14.46	12.86	8.66
51.5	7.75	14.33	12.64	8.38
52	7.57	14.19	12.42	8.10
52.5	7.39	14.06	12.20	7.82
53	7.21	13.92	11.98	7.54
53.5	7.03	13.79	11.76	7.26
54	6.85	13.65	11.54	6.98
54.5	6.66	13.52	11.32	6.70
55	6.48	13.38	11.09	6.42
55.5	6.30	13.24	10.87	6.14
56	6.12	13.11	10.65	5.86
56.5	5.94	12.97	10.43	5.58
57	5.76	12.84	10.21	5.30
57.5	5.58	12.70	9.99	5.02
58	5.40	12.57	9.77	4.74
58.5	5.22	12.43	9.55	4.46
59	5.03	12.30	9.32	4.18
59.5	4.85	12.16	9.10	3.90
60	4.67	12.03	8.88	3.62
60.5	4.58	11.81	8.75	3.69
61	4.49	11.59	8.62	3.75
61.5	4.39	11.38	8.50	3.81
62	4.30	11.16	8.37	3.87
62.5	4.21	10.94	8.24	3.93
63	4.12	10.72	8.11	3.99
63.5	4.03	10.51	7.98	4.05
64	3.93	10.29	7.85	4.11
64.5	3.84	10.07	7.72	4.17
65	3.75	9.85	7.59	4.23
65.5	3.66	9.64	7.46	4.30
66	3.56	9.42	7.33	4.36
66.5	3.47	9.20	7.20	4.42
67	3.38	8.99	7.08	4.48
67.5	3.29	8.77	6.95	4.54
68	3.20	8.55	6.82	4.60
68.5	3.10	8.33	6.69	4.66
69	3.01	8.12	6.56	4.72
69.5	2.92	7.90	6.43	4.78
70	2.83	7.68	6.30	4.84
70.5	2.77	7.51	6.15	4.71
71	2.71	7.34	5.99	4.58
71.5	2.66	7.16	5.84	4.45
72	2.60	6.99	5.69	4.32
73	2.49	6.64	5.38	4.05
73.5	2.43	6.47	5.22	3.92
74	2.37	6.30	5.07	3.79
74.5	2.32	6.12	4.92	3.66
75	2.26	5.95	4.76	3.52
75.5	2.21	5.78	4.61	3.39
76	2.15	5.60	4.46	3.26
76.5	2.09	5.43	4.30	3.13
77	2.04	5.26	4.15	3.00
78	1.92	4.91	3.84	2.73
78.5	1.87	4.74	3.69	2.60
79	1.81	4.57	3.53	2.47
79.5	1.75	4.39	3.38	2.34
80	1.70	4.22	3.22	2.20
80.5	1.69	4.27	3.16	2.15
81	1.68	4.32	3.10	2.09
81.5	1.66	4.37	3.04	2.03
82	1.65	4.42	2.97	1.98
82.5	1.64	4.47	2.91	1.92
83	1.63	4.52	2.85	1.86
83.5	1.62	4.57	2.79	1.80
84	1.61	4.62	2.72	1.75
84.5	1.60	4.67	2.66	1.69
85	1.58	4.72	2.60	1.63
85.5	1.57	4.77	2.53	1.58
86	1.56	4.82	2.47	1.52
86.5	1.55	4.87	2.41	1.46
87	1.54	4.92	2.35	1.41
87.5	1.53	4.97	2.28	1.35
88	1.52	5.02	2.22	1.29
88.5	1.50	5.07	2.16	1.23
89	1.49	5.13	2.10	1.18
89.5	1.48	5.18	2.03	1.12
90	1.47	5.23	1.97	1.06
90.5	1.44	5.01	1.92	1.05
91	1.41	4.80	1.86	1.04
91.5	1.38	4.59	1.81	1.02
92	1.35	4.37	1.75	1.01
93	1.30	3.95	1.64	0.98
93.5	1.27	3.73	1.58	0.97
94	1.24	3.52	1.53	0.95
94.5	1.21	3.31	1.47	0.94
95	1.18	3.10	1.42	0.93
95.5	1.15	2.88	1.36	0.91
96	1.13	2.67	1.31	0.90
96.5	1.10	2.46	1.25	0.88
97	1.07	2.24	1.20	0.87
97.5	1.04	2.03	1.14	0.86
98	1.01	1.82	1.09	0.84
98.5	0.98	1.60	1.03	0.83
99	0.95	1.39	0.98	0.82
99.5	0.93	1.18	0.92	0.80
100	0.90	0.96	0.87	0.79
