# Supplementary material
Source: ML conference proceedings conference paper supplement (https://proceedings.neurips.cc/paper_files/paper/2022/hash/4937610670be26d651ecdb4f2206d95f-Abstract.html)
Supplement: Supplementary file 1 [file 4937610670be26d651ecdb4f2206d95f-Supplemental-Conference.zip › Fairness_Transferability/dp_states/main.py]

import time
from FairTransferByYear import run

state_list = ['AL', 'AK', 'AZ', 'AR', 'CA', 'CO', 'CT', 'DE', 'FL', 'GA', 'HI',
              'ID', 'IL', 'IN', 'IA', 'KS', 'KY', 'LA', 'ME', 'MD', 'MA', 'MI',
              'MN', 'MS', 'MO', 'MT', 'NE', 'NV', 'NH', 'NJ', 'NM', 'NY', 'NC',
              'ND', 'OH', 'OK', 'OR', 'PA', 'RI', 'SC', 'SD', 'TN', 'TX', 'UT',
              'VT', 'VA', 'WA', 'WV', 'WI', 'WY', 'PR']
sYear = 2014
tYear = 2018

for state in state_list:
    print(f"Start running {state} data at {time.ctime()}")
    run(state, 2014, 2018)
