# Supplementary material
Source: ML conference proceedings conference paper supplement (https://proceedings.neurips.cc/paper_files/paper/2022/hash/4937610670be26d651ecdb4f2206d95f-Abstract.html)
Supplement: Supplementary file 1 [file 4937610670be26d651ecdb4f2206d95f-Supplemental-Conference.zip › Fairness_Transferability/readme.md]

# Fair Transferability Subject to Bounded Distribution Shift

These files accompany the paper [Fair Transferability Subject to Bounded Distribution Shift](https://arxiv.org/abs/2206.00129) accepted by Neurips 2022. - [Yatong Chen](https://github.com/YatongChen/), [Reilly Raab](https://reillyraab.com/), [Jialu Wang](https://people.ucsc.edu/~jwang470/), [Yang Liu](https://.yliuu.com/).

## Abstract: 
Given an algorithmic predictor that is "fair"' on some source distribution, will it still be fair on an unknown target distribution that differs from the source within some bound? In this paper, we study the transferability of statistical group fairness for machine learning predictors (i.e., classifiers or regressors subject to bounded distribution shift. Such shifts may be introduced by initial training data uncertainties, user adaptation to a deployed predictor, dynamic environments, or the use of pre-trained models in new settings. Herein, we develop a bound that characterizes such transferability, flagging potentially inappropriate deployments of machine learning for socially consequential tasks. We first develop a framework for bounding violations of statistical fairness subject to distribution shift, formulating a generic upper bound for transferred fairness violations as our primary result.  We then develop bounds for specific worked examples, focusing on two commonly used fairness definitions (i.e., demographic parity and equalized odds) and two classes of distribution shift (i.e., covariate shift and label shift). Finally, we compare our theoretical bounds to deterministic models of distribution shift and against real-world data, finding that we are able to estimate fairness violation bounds in practice, even when simplifying assumptions are only approximately satisfied.

## Appendices

See the file
```
Appendices.pdf
```
included in this archive.

## Code

### Dependencies

Replicable Python environment
(using [conda](https://docs.conda.io/en/latest/miniconda.html))

```
├── environment.yml
```

$ conda env create -n fairtransfer --file environment.yml

### Figures 3a, 7, 8

Source data:

https://github.com/fairmlbook/fairmlbook.github.io/tree/master/code/creditscore/data

@book{barocas-hardt-narayanan,
  title = {Fairness and Machine Learning},
  author = {Solon Barocas and Moritz Hardt and Arvind Narayanan},
  publisher = {fairmlbook.org},
  note = {\url{http://www.fairmlbook.org}},
  year = {2019}
}

Instructions:

Run covariate/main.py. Intermediate values are saved as pickled arrays
for subsequent faster generation of plots.

```
├── covariate
│   ├── cdf_by_race.csv          -- source data
│   ├── default_by_race.csv      -- source data
│   ├── DP_bound.pdf             -- output (pdf)
│   ├── dp_max_bgs                 -- intermediate data (pickled array)
│   ├── dp_source_ac               -- intermediate data (pickled array)
│   ├── dp_strategic_manipulation  -- intermediate data (pickled array)
│   ├── dp_upper_bound             -- intermediate data (pickled array)
│   ├── EO_bound.pdf             -- output (pdf)
│   ├── main.py                  -- run this
│   ├── max_bgs                    -- intermediate data (pickled array)
│   ├── source_tpr                 -- intermediate data (pickled array)
│   ├── strategic_manipulation     -- intermediate data (pickled array)
│   ├── totals.csv               -- source data
│   └── upper_bound                -- intermediate data (pickled array)
```

### Figure 3b

Instructions:

Run replicator/main.py

```
├── replicator
│   ├── classifiers.py
│   ├── main.py
│   ├── readme.md
│   ├── responses.py
│   ├── setting.py
│   ├── s.p
│   ├── state.py
│   ├── system.py
│   ├── transfer.pdf
│   └── util.py
```

### Figures 1, 4, 9, 10

Instructions:

Run states/main.py

```
└── dp_states
    ├── FairTransferByState.py
    ├── FairTransferByYear.py
    └── main.py
```


### Figure 11

```
└── cov_states
│   ├── *_phi_g                    -- intermediate data (pickled array)
│   ├── *_phi_h                    -- intermediate data (pickled array)
│   ├── *_shifted_viol             -- intermediate data (pickled array)
│   ├── *_upper_bound              -- intermediate data (pickled array)
│   ├── *_cdf.pdf                -- source data per state
│   ├── *_default.pdf            -- source data per state
│   ├── totals.csv               -- source data
```
## Citation

If you want to cite our paper, please cite the following format:

```
@article{chen2022fairness,
  title={Fairness Transferability Subject to Bounded Distribution Shift},
  author={Chen, Yatong and Raab, Reilly and Wang, Jialu and Liu, Yang},
  journal={Advances in Neural Information Processing Systems},
  volume={36},
  year={2022}
}
```
