# Supplementary material
Source: ML conference proceedings conference paper supplement (https://proceedings.neurips.cc/paper_files/paper/2022/hash/4937610670be26d651ecdb4f2206d95f-Abstract.html)
Supplement: Supplementary file 1 [file 4937610670be26d651ecdb4f2206d95f-Supplemental-Conference.zip › Fairness_Transferability/replicator/readme.md]

Previously published code, modified for this project

# Contents
```
.
├── main.py             - edit and run this file to generate plots
├── classifiers.py      - defines classifiers/interventions
├── responses.py        - defines population response functions
├── setting.py          - object representing bundled parameters
├── system.py           - object bundling setting, classifier, and response
├── state.py            - object representing point in phase space
├── plot.py             - defines organization of matplotlib figures
└── util.py             - misc. utility functions
```

# Instructions

Edit main.py as necessary to specify desired system and plot parameters (see
commented examples).


``` sh
python3 main.py
```
